# Supplementary material
Source: HighWire-hosted journal article supplement (https://jnm.snmjournals.org/highwire/filestream/99060/field_highwire_adjunct_files/0/233072_Supplemental_Data.pdf)
Supplement: 233072_Supplemental_Data.pdf [file 233072_Supplemental_Data.pdf]

## Disclaimer of Variability Between Institutions.

†Indicates experiments done at Stanford University. Anesthesia supplement for in vivo experiments was pure oxygen, resulting in lower baseline uptake for all radiotracers.

‡Indicates experiments done at MSK. Anesthesia supplement for in vivo experiments was medical air, resulting in slightly hypoxic conditions and higher baseline uptake for all radiotracers.

†‡Indicates experiments done at both Stanford and MSK, with average data pooled.

In the spirit of full transparency, we have included all data done at Stanford and MSK and indicate where the data was collected to make our multi-institutional collaboration extremely clear for the reader.

We have included thorough statistical analysis of not only vehicle vs. LPS groups for both pHLIC and control radiotracers, but also uptake of the pHLIC vs. control radiotracer between LPS groups. The key result highlighting the difference between LPS groups is represented in the ex vivo biodistribution at 24 h (Supplemental Fig. 18 and Supplemental Table 8), coupled to the autoradiography (Fig. 6) at 24 h and serves as an appropriate demonstration of specificity for the acid-sensitive radiotracer [ $^{64}\text{Cu}$ ]Cu-NO<sub>2</sub>A-c[E<sub>4</sub>W<sub>5</sub>C]. We show significantly higher uptake with our pHLIC radiotracer in the brain compared to our [ $^{64}\text{Cu}$ ]Cu-NO<sub>2</sub>A-c[R<sub>4</sub>W<sub>5</sub>C] control. Additionally, our biophysical measurements (Supplemental Fig. 6) indicate the pH-sensitivity of the pHLIC ( $^{\text{nat}}\text{Cu}$ -NO<sub>2</sub>A-c[E<sub>4</sub>W<sub>5</sub>C] vs. non-acid-sensitive control ( $^{\text{nat}}\text{Cu}$ -NO<sub>2</sub>A-c[R<sub>4</sub>W<sub>5</sub>C]), further supporting the specificity of our pHLIC tracer for acidosis. We hope the discrepancy in baseline uptake of tracer between institutions (albeit similar trends and statistics between vehicle and LPS groups) will serve as a reminder to the nuclear medicine field how anesthesia and oxygen content can significantly change radiotracer uptake, especially with radiotracers that cross the BBB. We hold ourselves and the rest of the community to the highest standards and demonstrate the need for rigor and reproducibility among multi-institutional collaborations.

\*See references 2-6 for how oxygen and anesthesia time can affect cerebral blood flow and radiotracer uptake, particularly in neuroimaging.

## Materials and Methods.

**Synthesis and purification of pHLIC-NO<sub>2</sub>A Constructs.** Cyclic peptides c[E<sub>4</sub>W<sub>5</sub>C] or c[R<sub>4</sub>W<sub>5</sub>C] (1 mg, 0.6-0.65 μmol) was mixed with 2x stoichiometric excess NO<sub>2</sub>A-maleimide (1.2-1.3 μmol) in a 90:10 mixture of anhydrous dimethylformamide (DMF):degassed phosphate-buffered saline (PBS) for 2 h at 37 °C. The conjugate was purified using C<sub>18</sub> Preparative-HPLC with a 5-95% acetonitrile with 0.1% TFA over 40 min gradient (t<sub>R</sub> = 25 min) and evaluated using matrix assisted light desorption-ionization time-of-flight mass spectrometry (MALDI-ToF) or liquid chromatography mass spectrometry (LCMS). Two additional peptides (another cyclic “pHLIC” variant and one linear “pHLIP”) were also conjugated to NO<sub>2</sub>A-maleimide using similar methods.

**Cold labeling of c[E<sub>4</sub>W<sub>5</sub>C] and c[R<sub>4</sub>W<sub>5</sub>C].** pHLIC-NO<sub>2</sub>A conjugates (20 μL, 16 nmol) was diluted in 0.1 M NH<sub>4</sub>Ac (pH 5.5) and incubated with a 2x stoichiometric excess of <sup>nat</sup>CuCl<sub>2</sub> at 80 °C for 15 min. <sup>nat</sup>Cu-c[E<sub>4</sub>W<sub>5</sub>C] <sup>nat</sup>Cu-c[R<sub>4</sub>W<sub>5</sub>C] were purified using a C<sub>18</sub> Sep Pak with fractionated elutions of 100% ethanol. Fractions were validated for successful labeling and purity via LCMS, then pooled and lyophilized and sent to URI for biophysical measurements.

## Biophysical Studies.

**Liposome Preparation.** Large unilamellar vesicles (LUVs) were prepared by extrusion. POPC (1-palmitoyl-2-oleoyl-sn-glycero-3-phosphocholine, Avanti Polar Lipids) were dissolved in chloroform, desolvated on a rotary evaporator, and left under high vacuum for several hours. The phospholipid film was then rehydrated in 10 mM phosphate buffer pH 8.0, the lipid bilayer was gently dissolved, and extruded 21 times through the membranes with 50 nm pore sizes to obtain LUVs.

**Steady-State Fluorescence.** Freshly prepared peptides and POPC vesicles were mixed to have 3 μM of a peptide and 0.6 mM of lipids in the final solution. Steady-state fluorescence measurements were carried out on a PC1 spectrofluorometer (ISS, Inc.) under temperature control at 25 °C. Fluorescence was excited at 280 nm and recorded with the excitation and emission slits set at 4 nm. The polarizers

in the excitation and emission paths were set at the “magic” angle (54.7° from the vertical orientation) and vertically (0°), respectively.

**pH-Dependence.** pH-dependent partitioning of the constructs into a lipid bilayer of the membrane was examined by the shift of the position of the fluorescence spectral maximum for the constructs in the presence of POPC liposomes induced by a drop of pH from 7.4 to 4 by the addition of HCl. The constructs were incubated overnight with 50-nm POPC liposomes (final concentration of the peptides and POPC in solution was 3 μM and 0.6 mM, respectively), and pH decrease was achieved by the addition of aliquots of 0.5 and 0.1 M HCl. pH was measured by micro-electrode probe (Thermo Electron Corporation, Orion Ross Micro pH electrode). Fluorescence spectra were recorded at each pH value. The spectra were analyzed by the decomposition algorithms using Protein Fluorescence and Structural Toolkit (PFAST) toolkit to establish the position of the emission maximum (1). Finally, the positions of the fluorescence spectral maxima ( $\lambda_{max}$ ) were plotted versus pH, and the Henderson–Hasselbalch equation was used to fit the data (using Origin 9.0 software):

$$\lambda_{max} = \lambda_1 + \frac{\lambda_2 - \lambda_1}{1 + 10^{(pH-pK)}}$$

where  $\lambda_1$  and  $\lambda_2$  are the beginning and the end of the transition, respectively, and  $pK$  – is the midpoint of the transition.

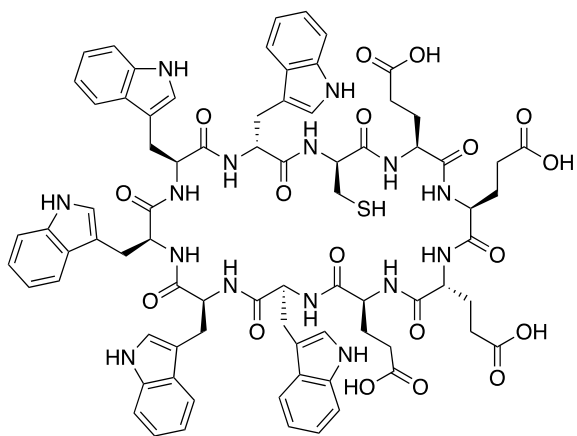

**c[E<sub>4</sub>W<sub>5</sub>C]**

Chemical Formula: C<sub>78</sub>H<sub>83</sub>N<sub>15</sub>O<sub>18</sub>S  
Molecular Weight: 1550.67

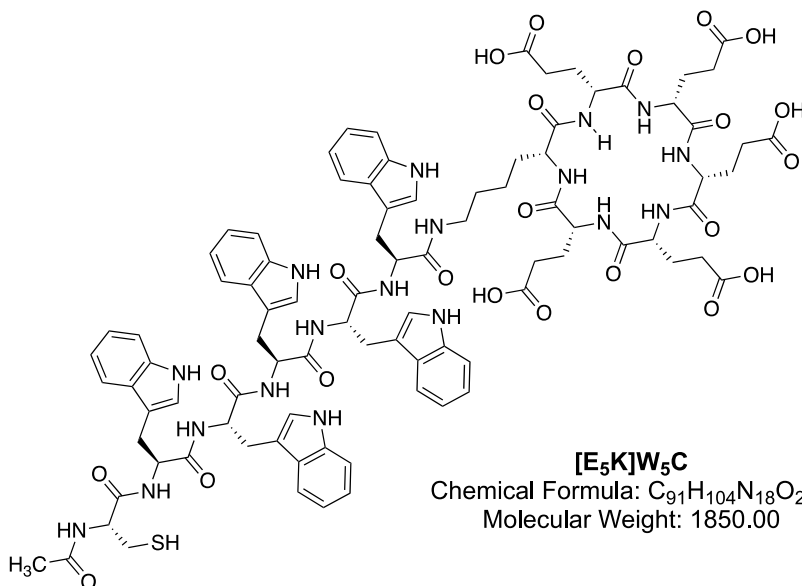

**[E<sub>5</sub>K]W<sub>5</sub>C**

Chemical Formula: C<sub>91</sub>H<sub>104</sub>N<sub>18</sub>O<sub>23</sub>S  
Molecular Weight: 1850.00

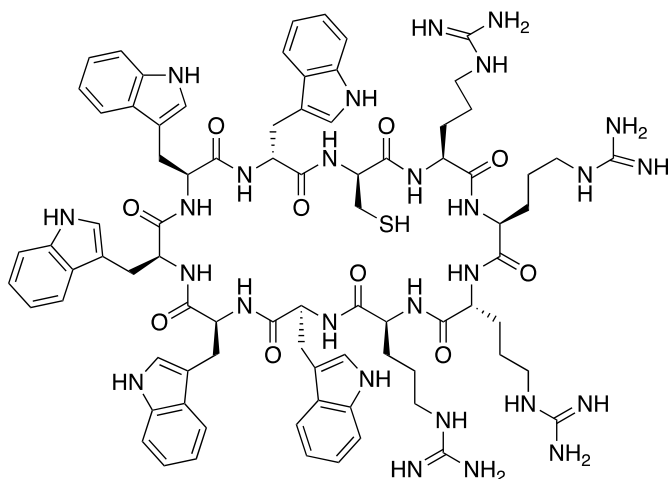

**c[R<sub>4</sub>W<sub>5</sub>C]**

Chemical Formula: C<sub>82</sub>H<sub>103</sub>N<sub>27</sub>O<sub>10</sub>S  
Molecular Weight: 1658.97

Sequence: GCDNNEGFFATLGGEIPLWSDVVLAIEG  
**pHLIP-HM2A**

Chemical Formula: C<sub>131</sub>H<sub>195</sub>N<sub>31</sub>O<sub>43</sub>  
Molecular Weight: 2924.19

**Supplemental Fig. 1.** Sequence and structure of pHLIP and pHLIC peptides.

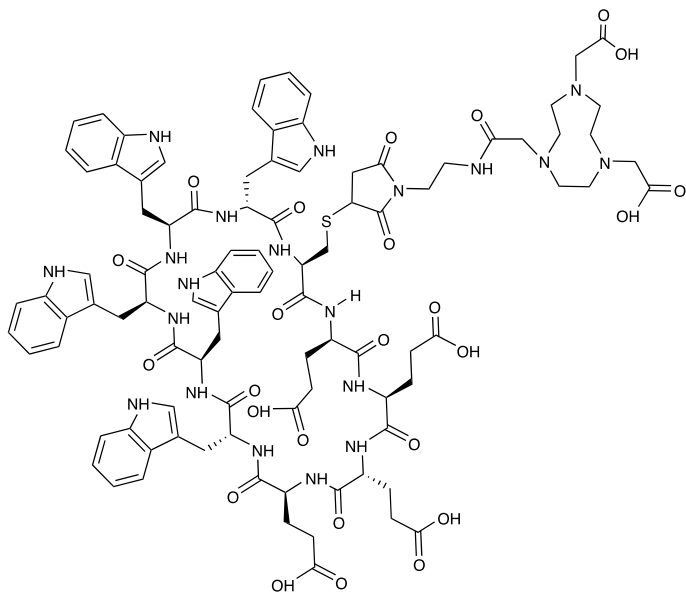

**c[E<sub>4</sub>W<sub>5</sub>C]-NO<sub>2</sub>A**  
 Chemical Formula: C<sub>96</sub>H<sub>110</sub>N<sub>20</sub>O<sub>25</sub>S  
 Molecular Weight: 1976.11

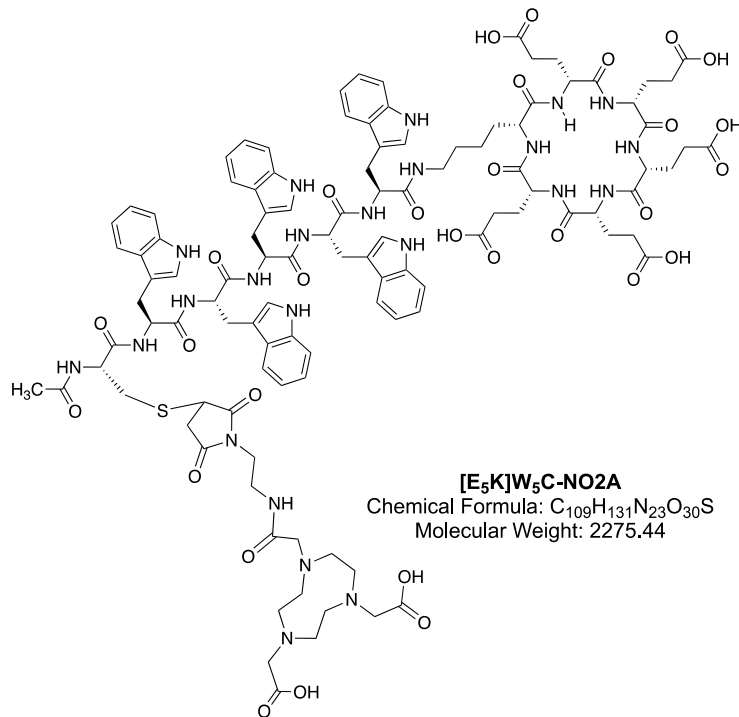

**[E<sub>5</sub>K]W<sub>5</sub>C-NO<sub>2</sub>A**  
 Chemical Formula: C<sub>109</sub>H<sub>131</sub>N<sub>23</sub>O<sub>30</sub>S  
 Molecular Weight: 2275.44

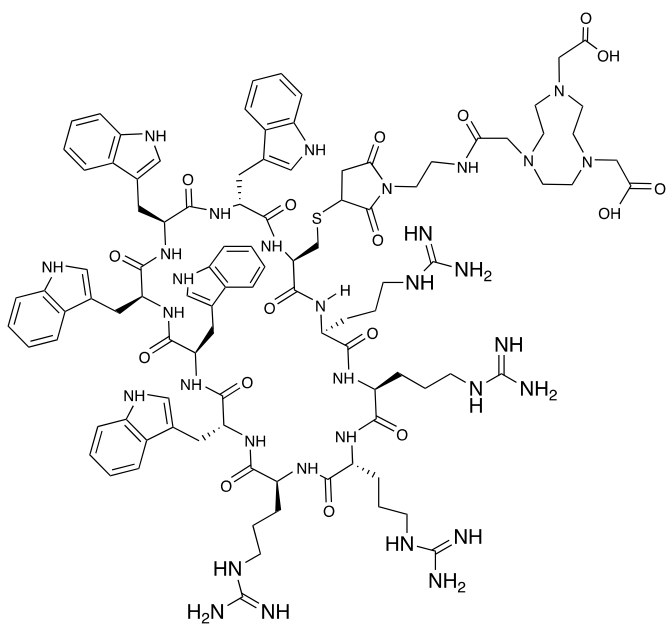

**c[R<sub>4</sub>W<sub>5</sub>C]-NO<sub>2</sub>A**  
 Chemical Formula: C<sub>100</sub>H<sub>130</sub>N<sub>32</sub>O<sub>17</sub>S  
 Molecular Weight: 2084.41

**Supplemental Fig. 2.** Structure of pHLIC-NO<sub>2</sub>A peptide conjugates.

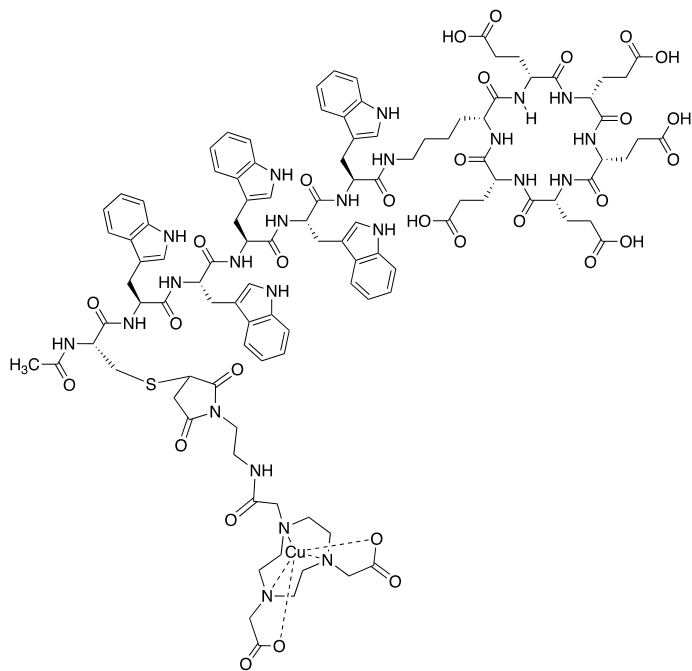

**[<sup>64</sup>Cu]Cu-NO2A-[E<sub>5</sub>K]W<sub>5</sub>C**

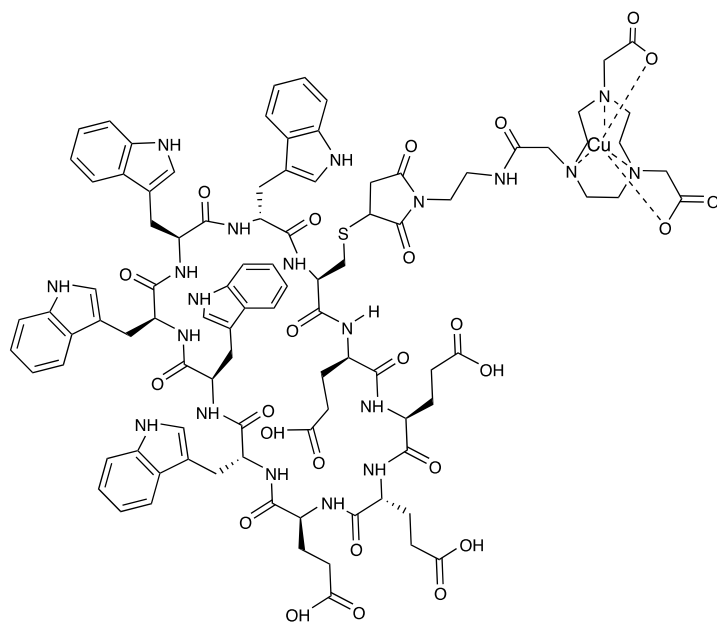

**[<sup>64</sup>Cu]Cu-NO2A-c[E<sub>4</sub>W<sub>5</sub>C]**

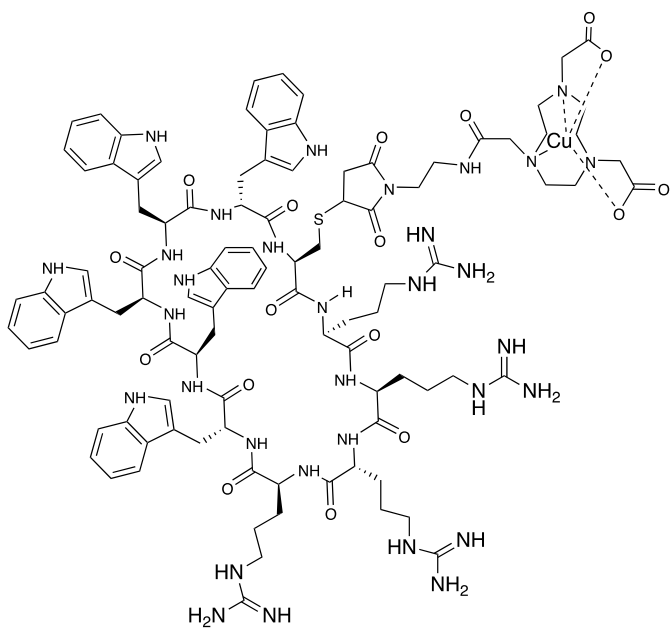

**[<sup>64</sup>Cu]Cu-NO2A-c[R<sub>4</sub>W<sub>5</sub>C]**

**Supplemental Fig. 3.** Structure of <sup>64</sup>Cu-labelled pHLIC-NO2A peptide conjugates.

‡**Supplemental Fig. 4.** Instant thin-layer chromatography quality control of all  $^{64}\text{Cu}$ -labelled pHLIC/pHLIP radiotracers.

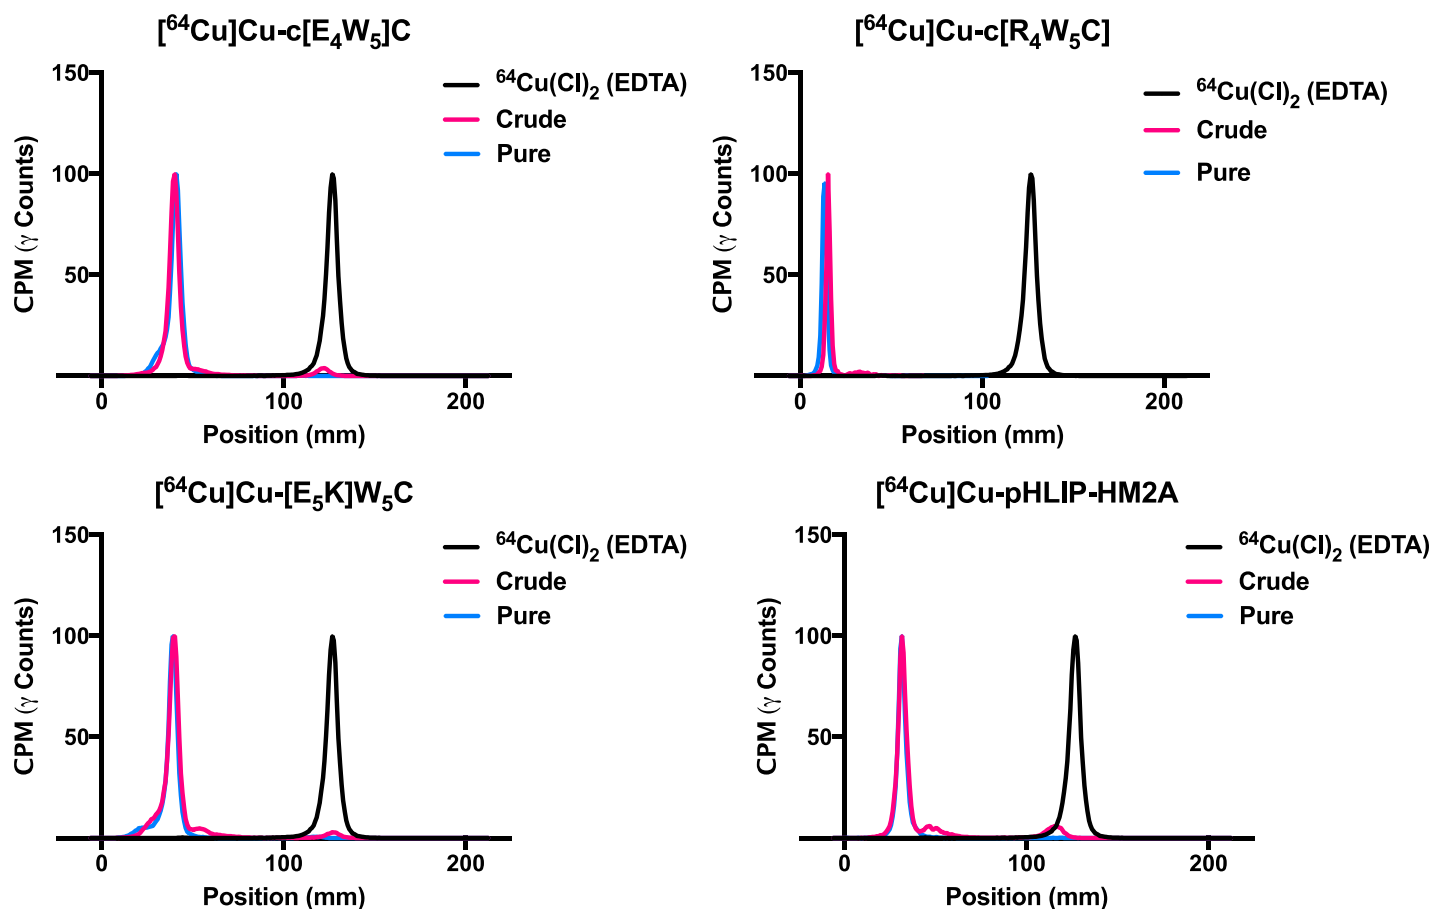

‡**Supplemental Table 1.** Experimentally determined LogP values of  $^{64}\text{Cu}$ -labelled pHLIC/pHLIP radiotracers.

| Compound                                                | LogD (pH 6) |   |     | LogD (pH 7.4) |   |     |
|---------------------------------------------------------|-------------|---|-----|---------------|---|-----|
| $^{64}\text{Cu}$ ]Cu-HM2A                               | -1.9        | ± | 0.1 | -2.2          | ± | 0.3 |
| $^{64}\text{Cu}$ ]Cu-c[E <sub>4</sub> W <sub>5</sub> C] | 2.5         | ± | 0.1 | 2             | ± | 0.2 |
| $^{64}\text{Cu}$ ]Cu-[E <sub>5</sub> K]W <sub>5</sub> C | 2.1         | ± | 0.1 | 2.3           | ± | 0.3 |

‡Supplemental Fig. 5. Serum stability of  $^{64}\text{Cu}$ -labelled pHLIC radiotracers ( $n = 3$ ).

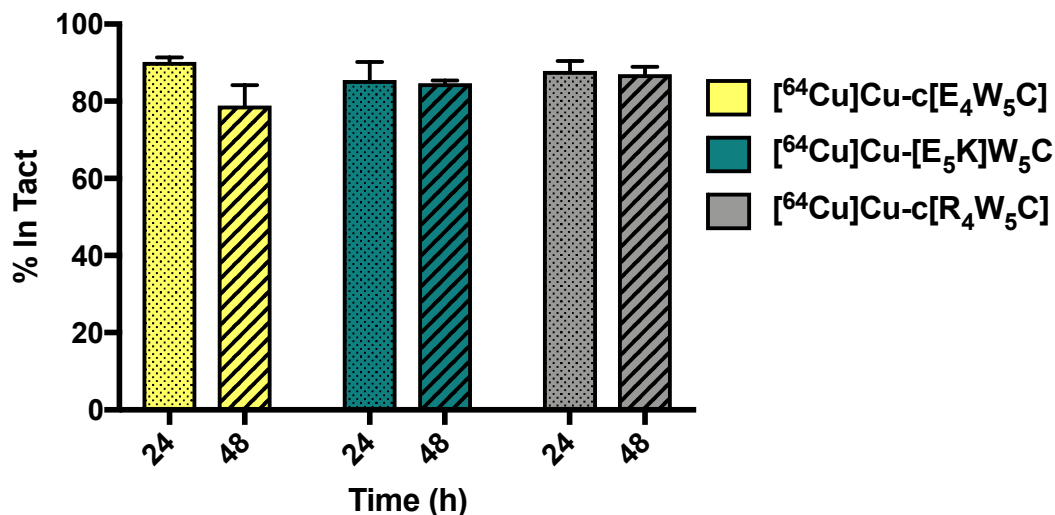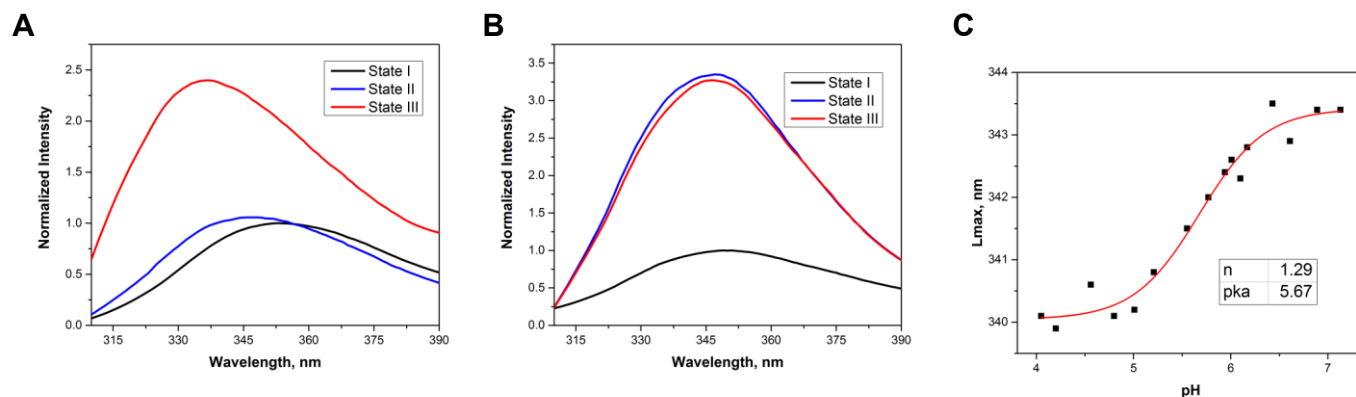

**Supplemental Fig. 6.** Tryptophan fluorescence spectra are shown from  $[^{\text{nat}}\text{Cu}]\text{Cu-c}[\text{E}_4\text{W}_5\text{C}]$  (A) and  $[^{\text{nat}}\text{Cu}]\text{Cu-c}[\text{R}_4\text{W}_5\text{C}]$  (B) in aqueous solution at pH 8 (black lines), at pH 8 in the presence of POPC liposomes (blue lines) and at pH 4 in the presence of POPC liposomes (red lines). The pH-dependent partition of  $[^{\text{nat}}\text{Cu}]\text{Cu-c}[\text{E}_4\text{W}_5\text{C}]$  into the lipid bilayers of POPC liposomes was studied by monitoring the changes in the position of maxima of fluorescence spectra as function of pH (C). The data were fitted using the Henderson-Hasselbalch equation, the fitting curves and 95% confidence interval are shown by red and pink areas, respectively.



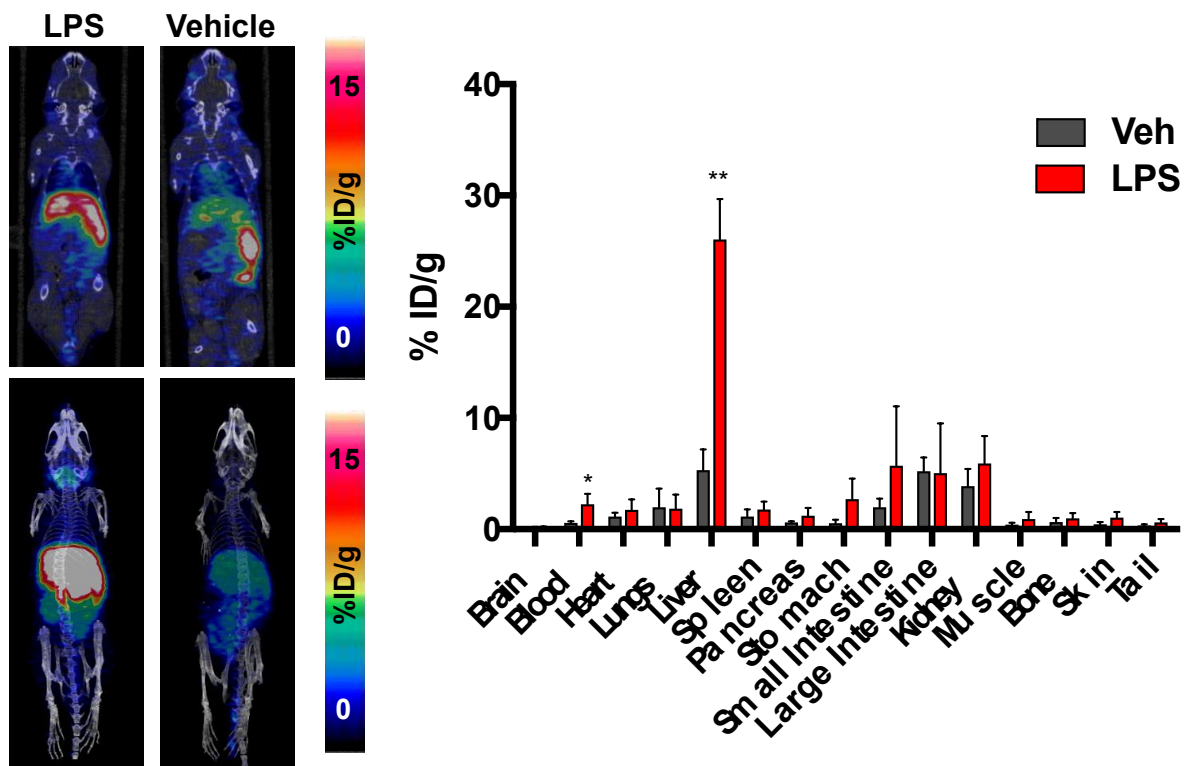

†**Supplemental Fig. 7.** PET imaging of  $[^{64}\text{Cu}]\text{Cu}-[\text{E}_5\text{K}]\text{W}_5\text{C}$  peptide and corresponding biodistribution at 24 h. The top panel represents coronal slices of the mice and the bottom panel represents the maximum intensity projections (MIPs). Data is represented as average %ID/g  $\pm$  SD with  $n = 3-4$  animals/group.

### [<sup>64</sup>Cu]Cu-NO<sub>2</sub>A-c[E<sub>4</sub>W<sub>5</sub>C]

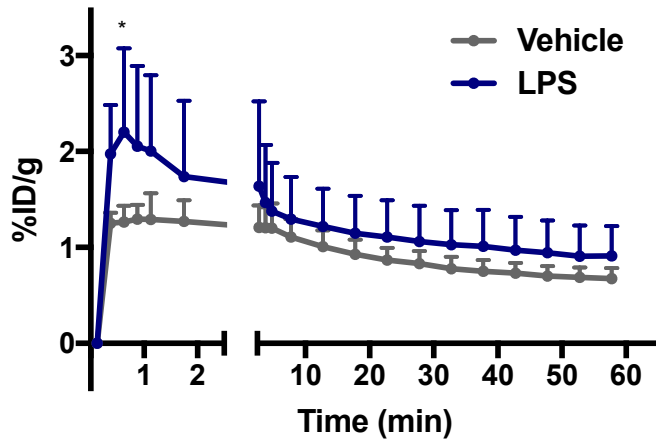

### [<sup>64</sup>Cu]Cu-NO<sub>2</sub>A-[E<sub>5</sub>K]W<sub>5</sub>C

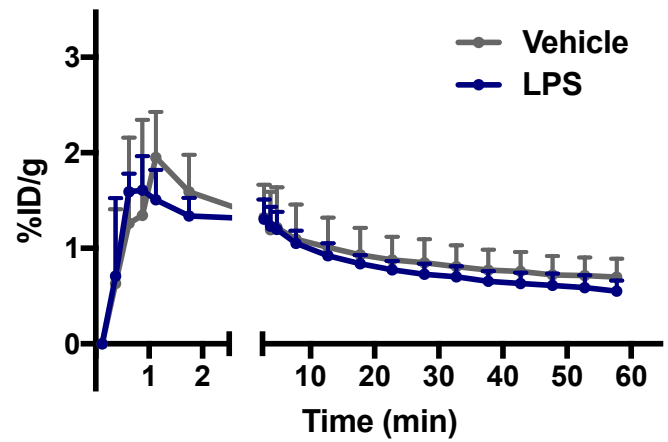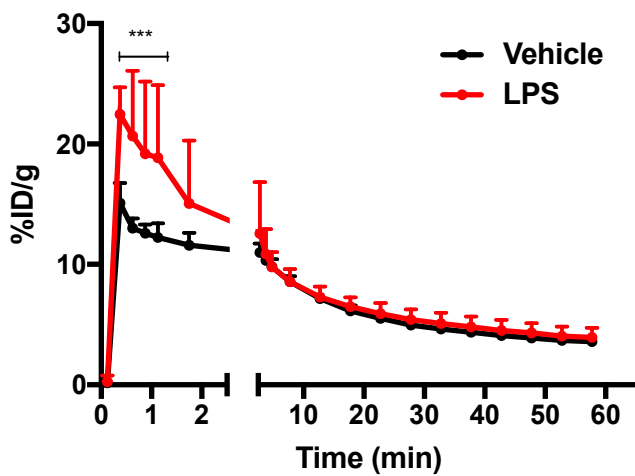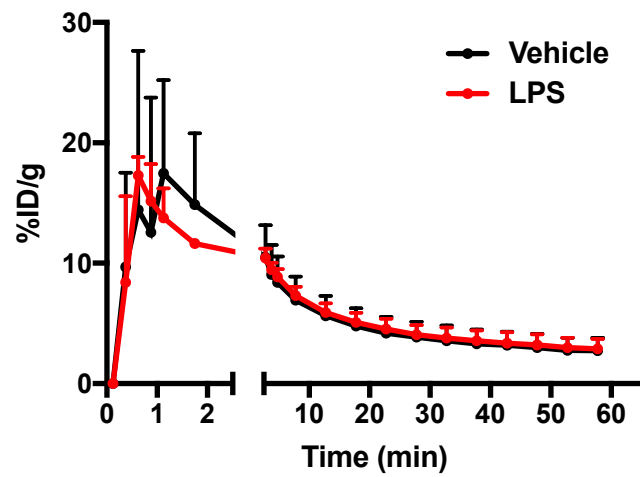

†**Supplemental Fig. 8.** Dynamic PET quantitation for the blood (top figures, red and black) and brain (bottom figures, blue and gray) uptake [<sup>64</sup>Cu]Cu-NO<sub>2</sub>A-c[E<sub>4</sub>W<sub>5</sub>C] and [<sup>64</sup>Cu]Cu-NO<sub>2</sub>A-[E<sub>5</sub>K]W<sub>5</sub>C PHLIC peptides. Data is represented as average %ID/g ± SD with *n* = 4 animals/group.

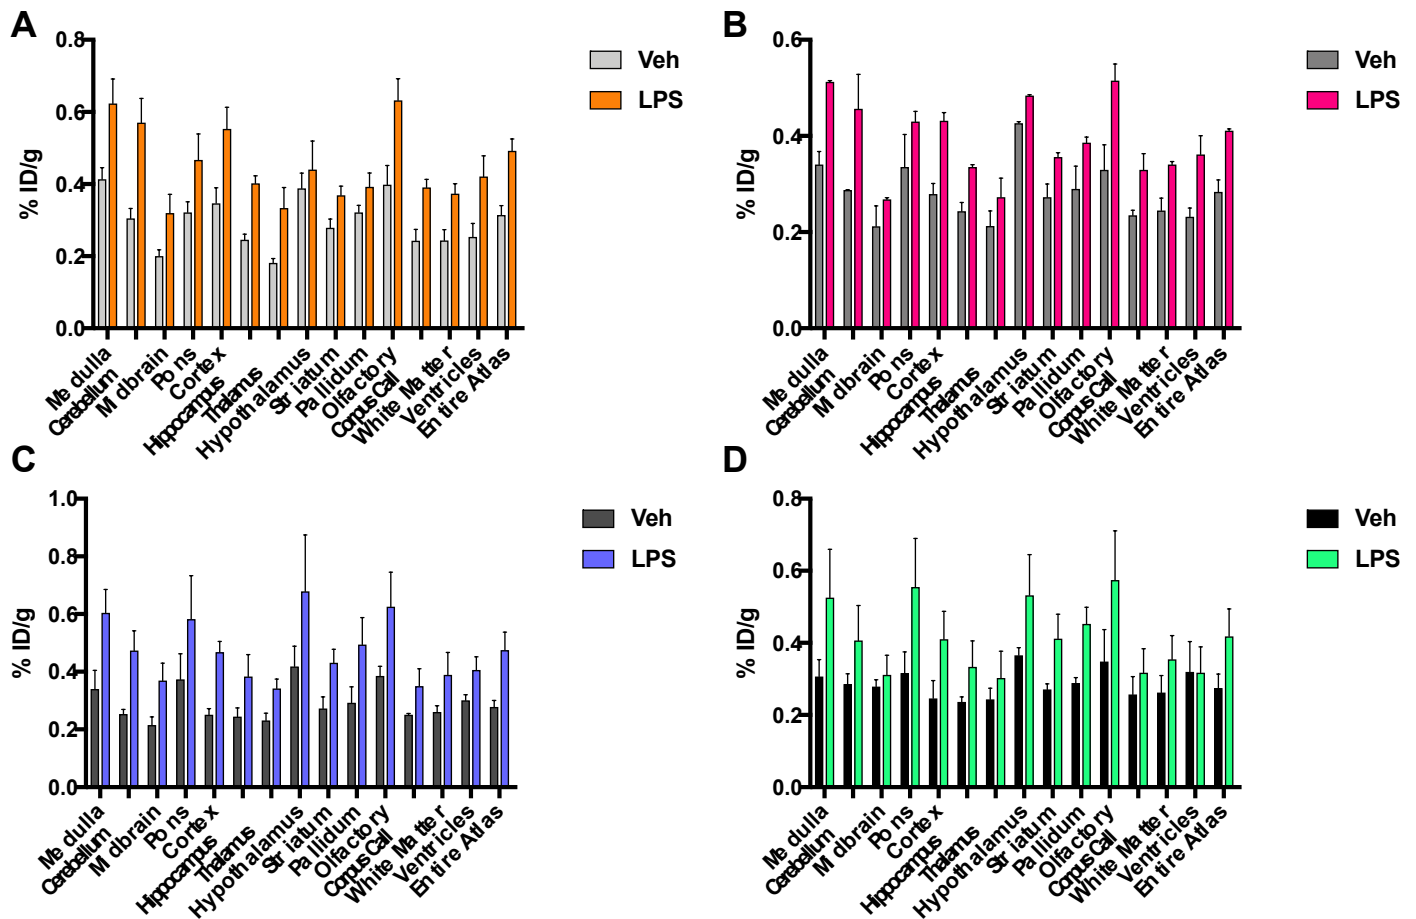

†**Supplemental Fig. 9.** Full brain PET quantitation of  $[^{64}\text{Cu}]\text{Cu-NO}_2\text{A-c[E}_4\text{W}_5\text{C]}$  at 4 h (A), 8 h (B), 12 h (C), and 24 h (D) post-LPS injection corresponding with values tabulated in Supporting Table 4. Data is represented as average %ID/g  $\pm$  SD with  $n = 4$  animals/group.

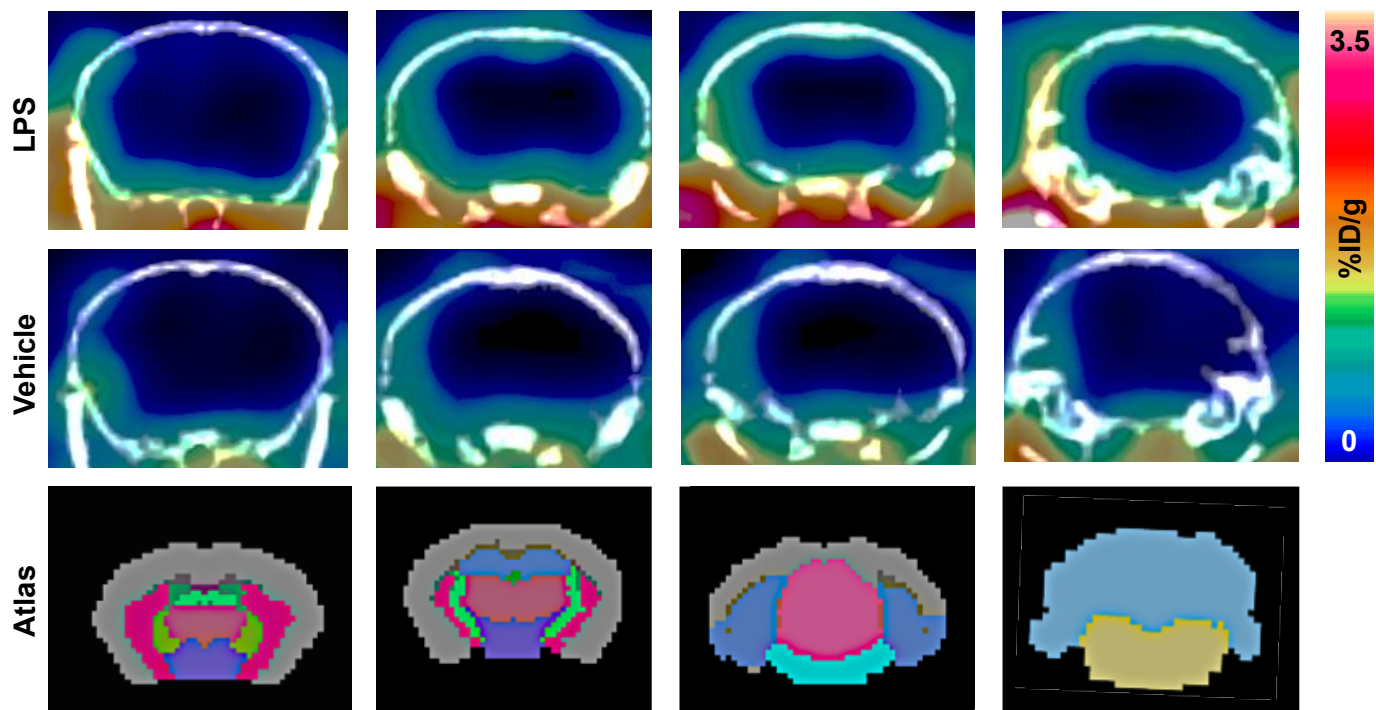

†**Supplemental Fig. 10.** Representative brain PET images of  $[^{64}\text{Cu}]\text{Cu-NO}_2\text{A-c[E}_4\text{W}_5\text{C]}$  4 h post-LPS injection ( $n = 4/\text{group}$ ).

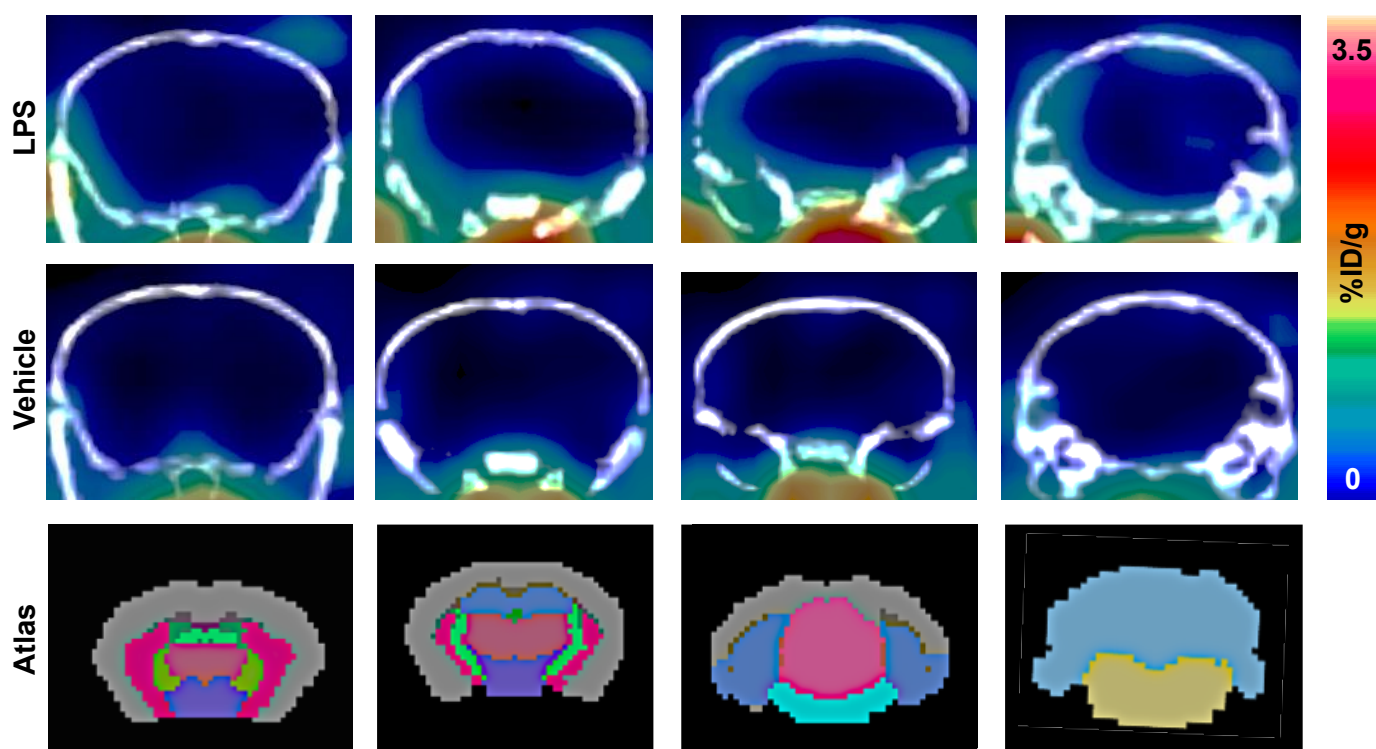

†**Supplemental Fig. 11.** Representative brain PET images of  $[^{64}\text{Cu}]\text{Cu-NO}_2\text{A-c[E}_4\text{W}_5\text{C]}$  8 h post-LPS injection ( $n = 4/\text{group}$ ).

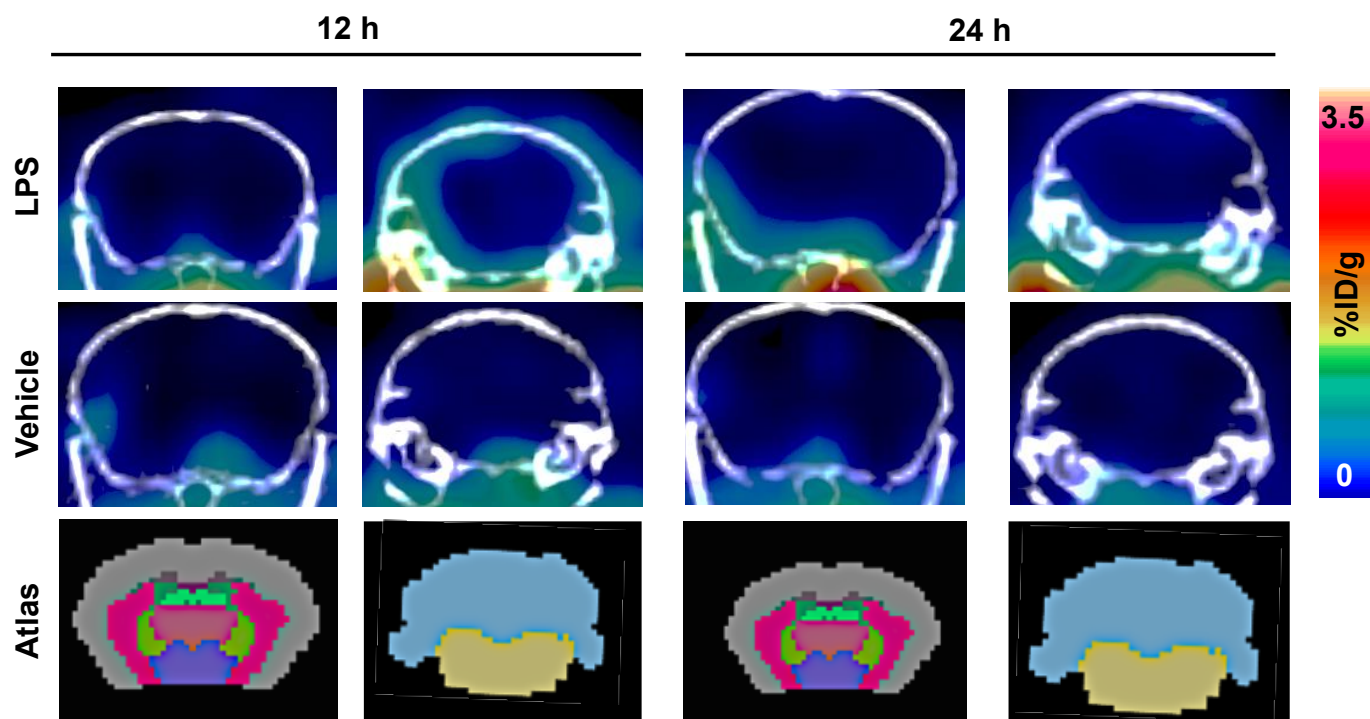

†**Supplemental Fig. 12.** Representative brain PET images of [ $^{64}\text{Cu}$ ]Cu-NO2A-c[E<sub>4</sub>W<sub>5</sub>C] at 12 and 24 h-post injection with LPS. These views are showing the same representative mice shown in Fig. 4, but with additional views of the frontal cortex and cerebellum ( $n = 4/\text{group}$ ).

**Supplemental Fig. 13.** Legend for inviCRO brain atlas represents segmentation algorithm used for PET quantitation.

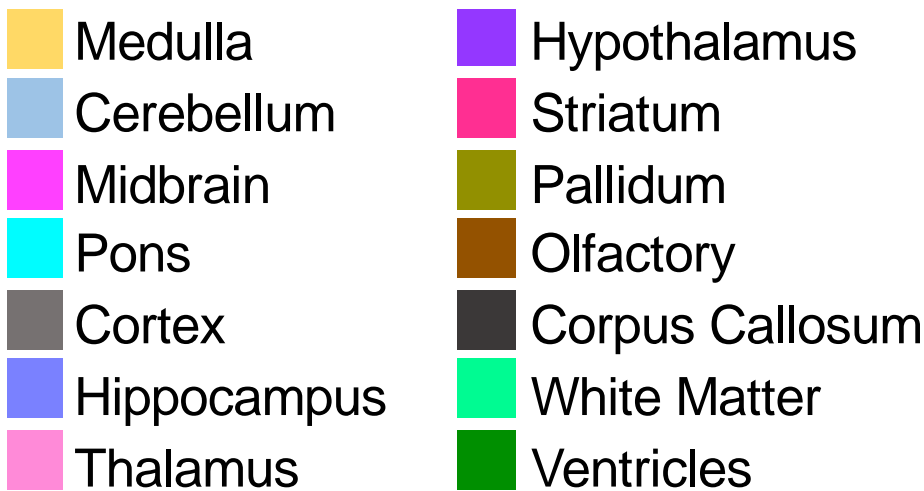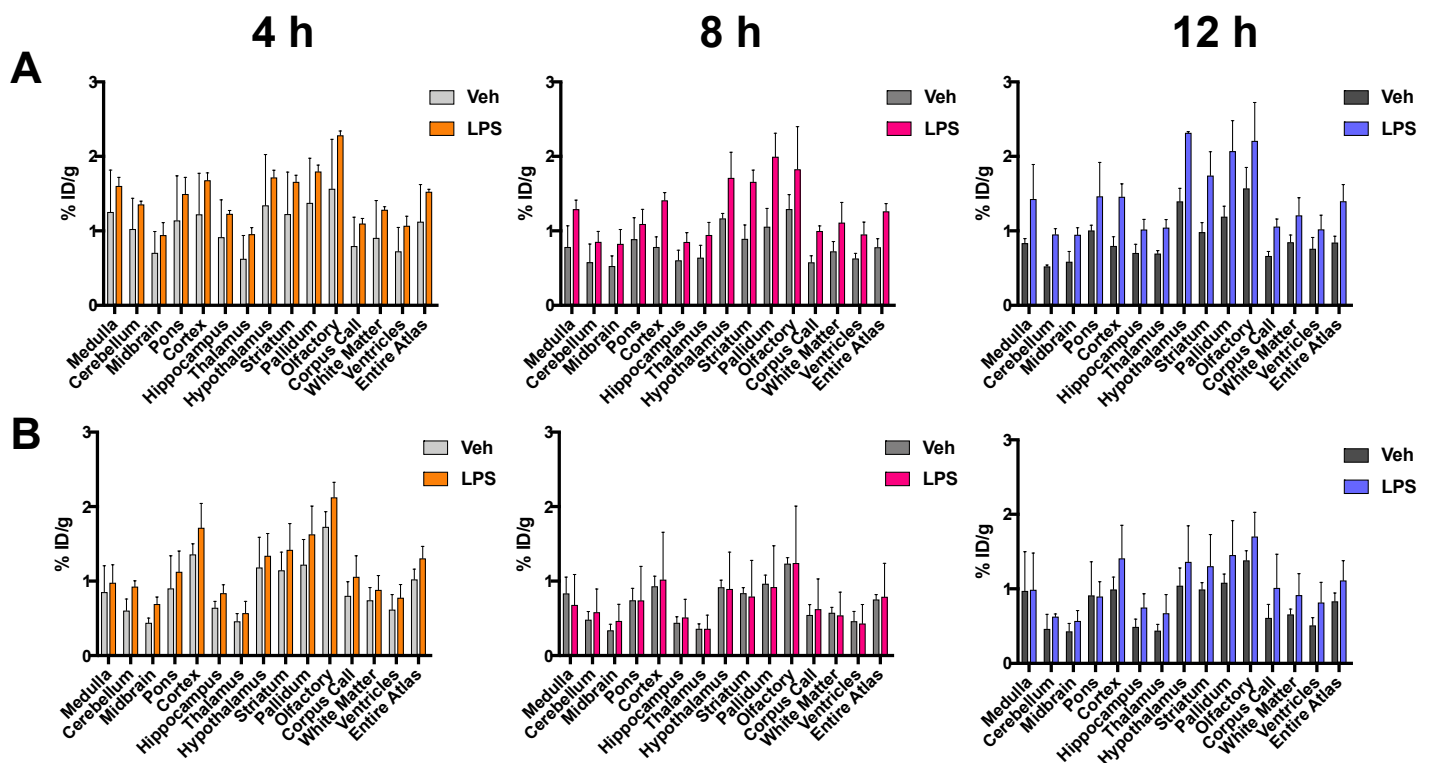

‡**Supplemental Fig. 14.** Full brain PET quantitation of and  $[^{64}\text{Cu}]\text{Cu-NO}_2\text{A-c}[\text{E}_4\text{W}_5\text{C}]$  (A) and  $[^{64}\text{Cu}]\text{Cu-NO}_2\text{A-c}[\text{R}_4\text{W}_5\text{C}]$  (B) at 4 h, 8 h, and 12 h post-LPS injection corresponding with values tabulated in Supporting Table 7. Data is represented as average %ID/g  $\pm$  SD with  $n = 4$  animals/group.

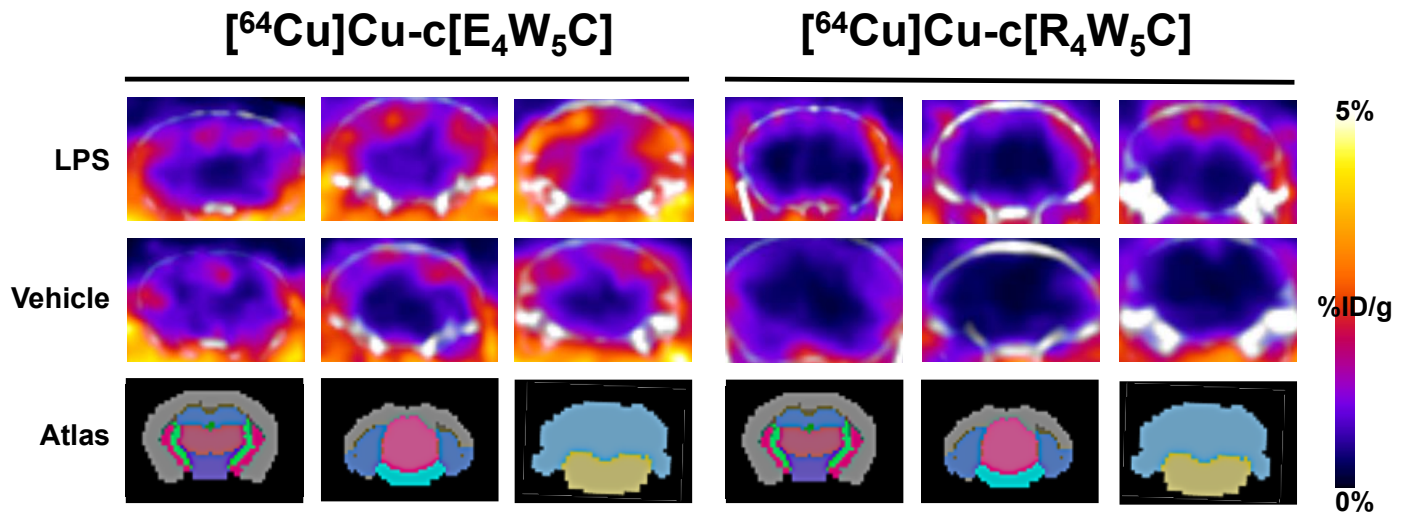

‡**Supplemental Fig. 15.** Representative brain PET images of  $[^{64}\text{Cu}]\text{Cu-NO}_2\text{A-c}[\text{E}_4\text{W}_5\text{C}]$  vs.  $[^{64}\text{Cu}]\text{Cu-NO}_2\text{A-c}[\text{R}_4\text{W}_5\text{C}]$  4 h post-injection with LPS (selected from groups of  $n = 4$ ).

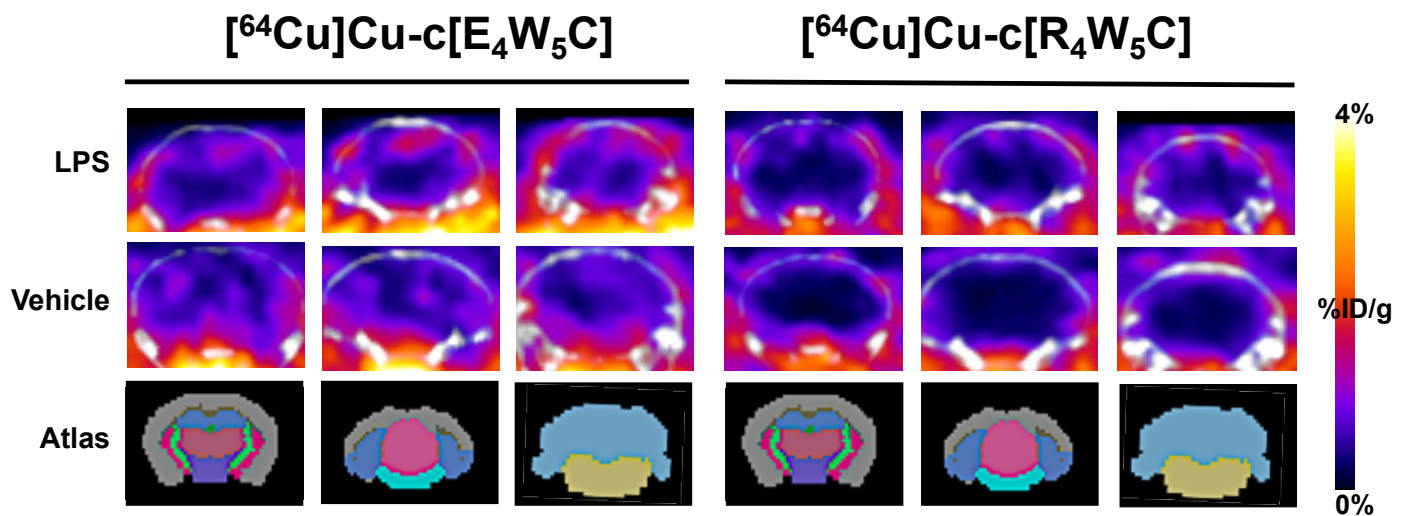

‡**Supplemental Fig. 16.** Representative brain PET images of  $[^{64}\text{Cu}]\text{Cu-NO}_2\text{A-c}[\text{E}_4\text{W}_5\text{C}]$  vs.  $[^{64}\text{Cu}]\text{Cu-NO}_2\text{A-c}[\text{R}_4\text{W}_5\text{C}]$  8 h post-injection with LPS (selected from groups of  $n = 4$ ).

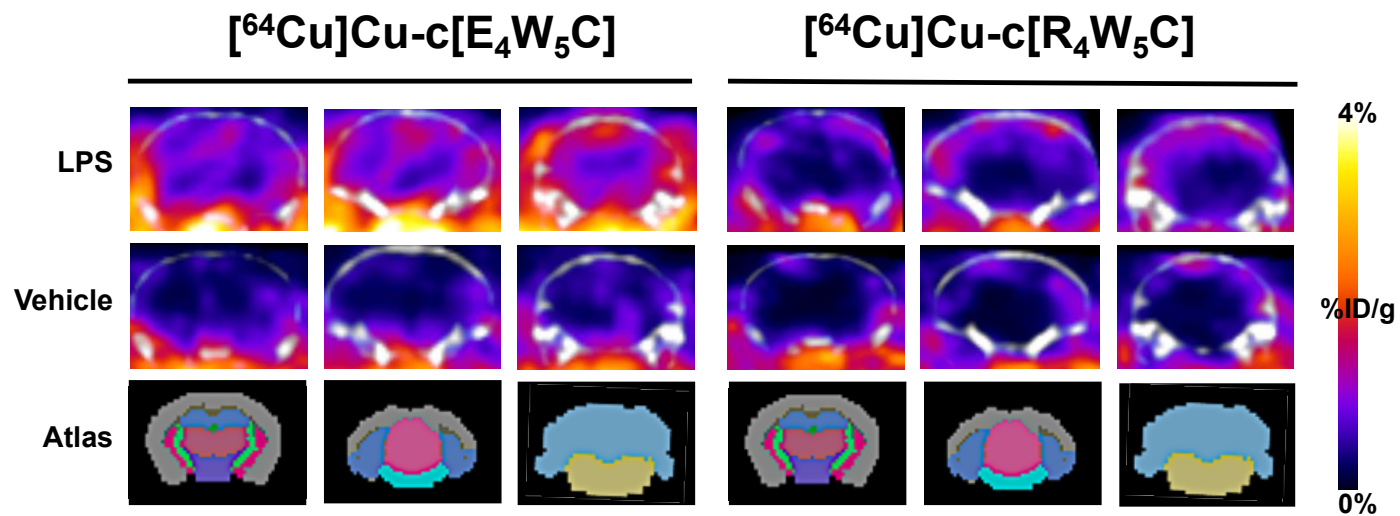

‡**Supplemental Fig. 17.** Representative brain PET images of  $[^{64}\text{Cu}]\text{Cu-NO}_2\text{A-c}[\text{E}_4\text{W}_5\text{C}]$  vs.  $[^{64}\text{Cu}]\text{Cu-NO}_2\text{A-c}[\text{R}_4\text{W}_5\text{C}]$  12 h post-injection with LPS (selected from groups of  $n = 4$ ).



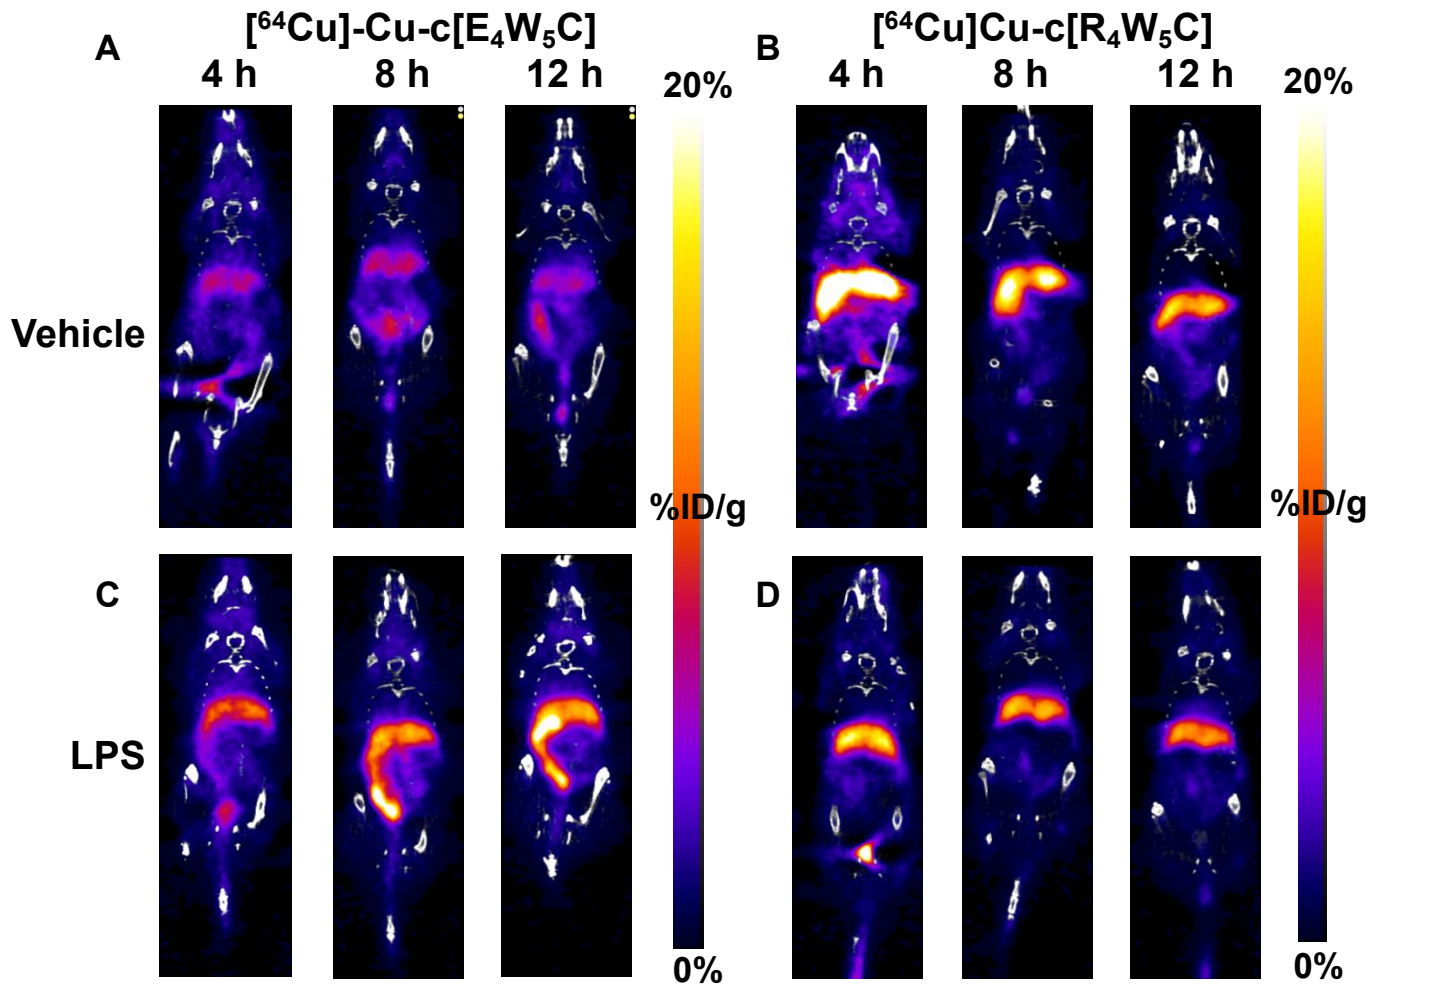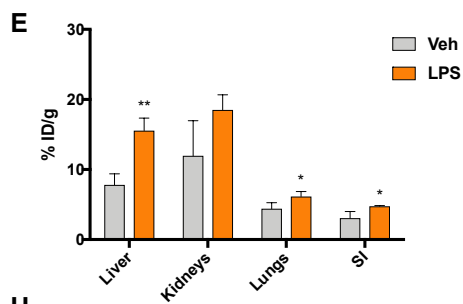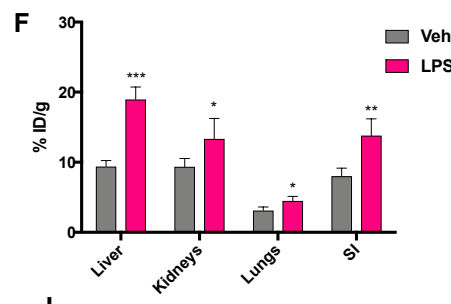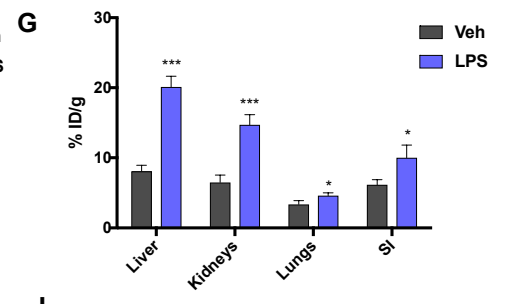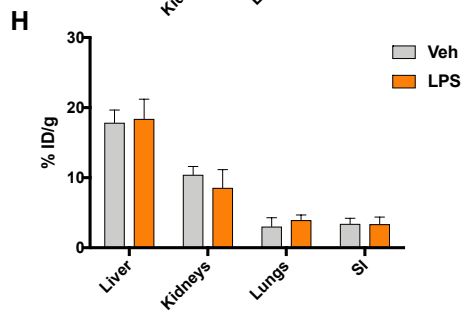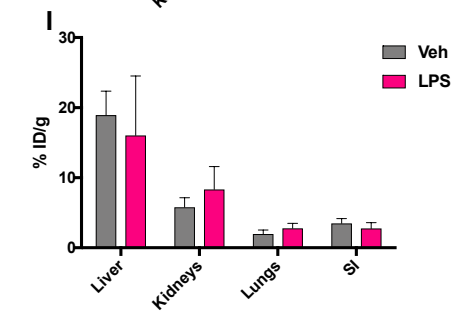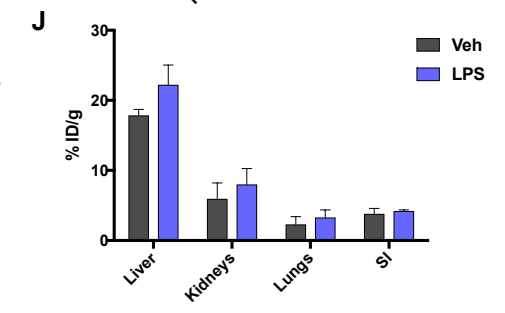

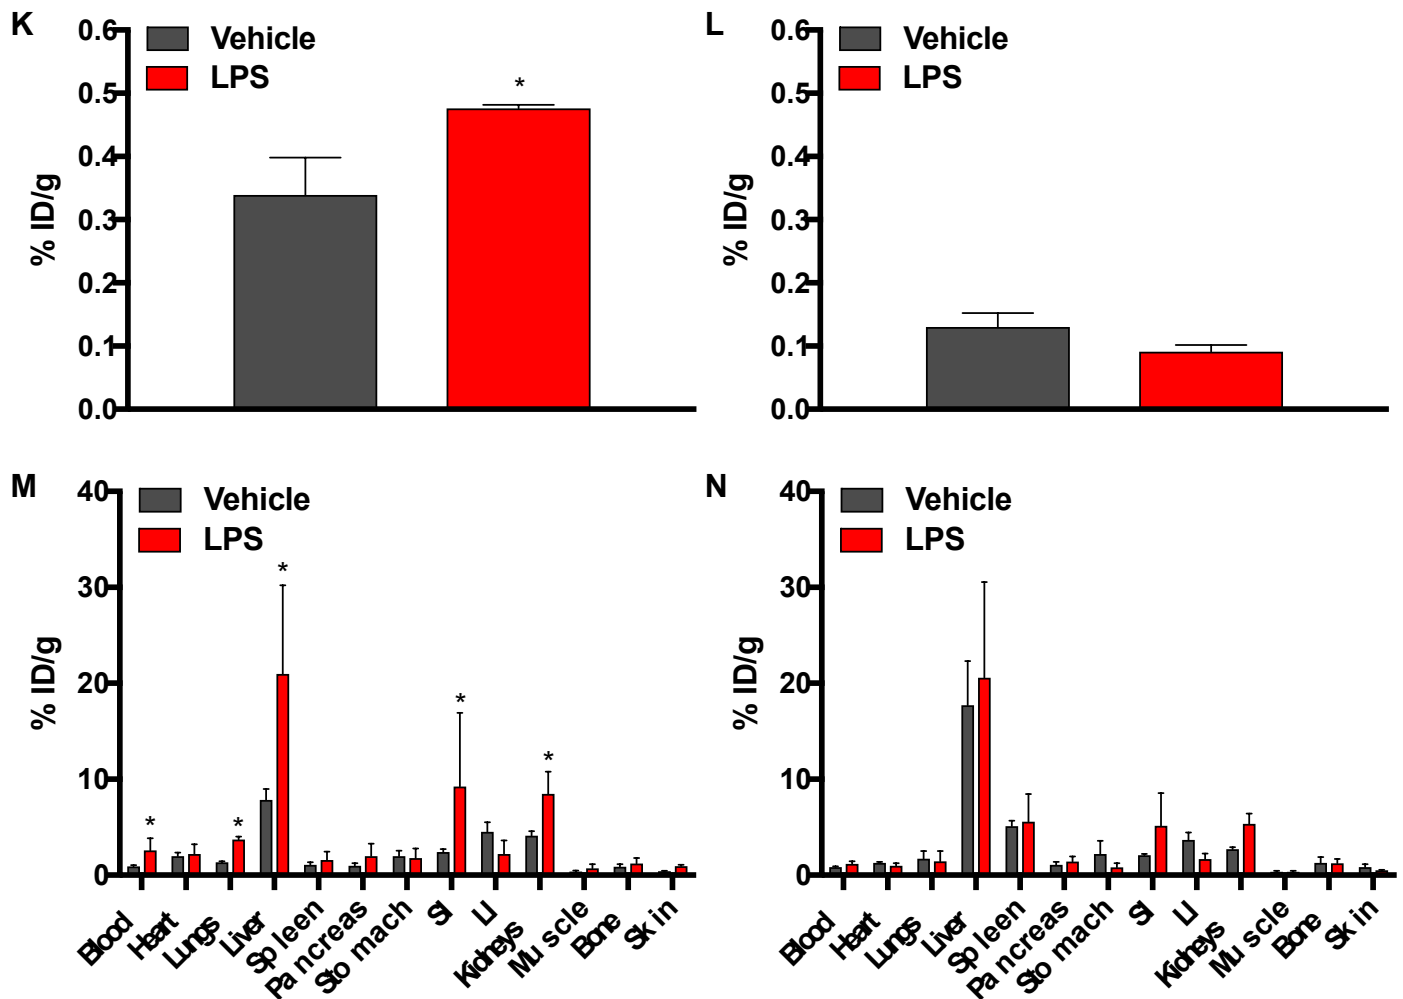

‡**Supplemental Fig. 18.** Serial PET imaging of  $[^{64}\text{Cu}]\text{Cu-c}[\text{E}_4\text{W}_5\text{C}]$  vs.  $[^{64}\text{Cu}]\text{Cu-c}[\text{R}_4\text{W}_5\text{C}]$  uptake in vehicle (A and B) vs. LPS-treated (C and D) mice over the course of 12 h ( $n = 4/\text{group}$ ). Peripheral quantitation of PET organs was performed by manually drawing ROIs around select tissues at 4 h, 8 h, and 12 h post-LPS inoculation for  $[^{64}\text{Cu}]\text{Cu-c}[\text{E}_4\text{W}_5\text{C}]$  (E, F, and G, respectively) and  $[^{64}\text{Cu}]\text{Cu-c}[\text{R}_4\text{W}_5\text{C}]$  at 4 h, 8 h, and 12 h post-LPS (H, I, and J, respectively). Full biodistribution was performed at 24 h post-LPS injection ( $n = 4/\text{group}$  for vehicle,  $n = 2/\text{LPS}$  for group, per radiotracer). Brain uptake (K) and respective whole-body values (M) are shown for  $[^{64}\text{Cu}]\text{Cu-c}[\text{E}_4\text{W}_5\text{C}]$  pHLIC. Brain uptake (L) and respective values (N) are shown for  $[^{64}\text{Cu}]\text{Cu-c}[\text{R}_4\text{W}_5\text{C}]$  control. Tabulated values for peripheral PET and ex vivo biodistribution can be found in Supplemental Tables 8 and 9.

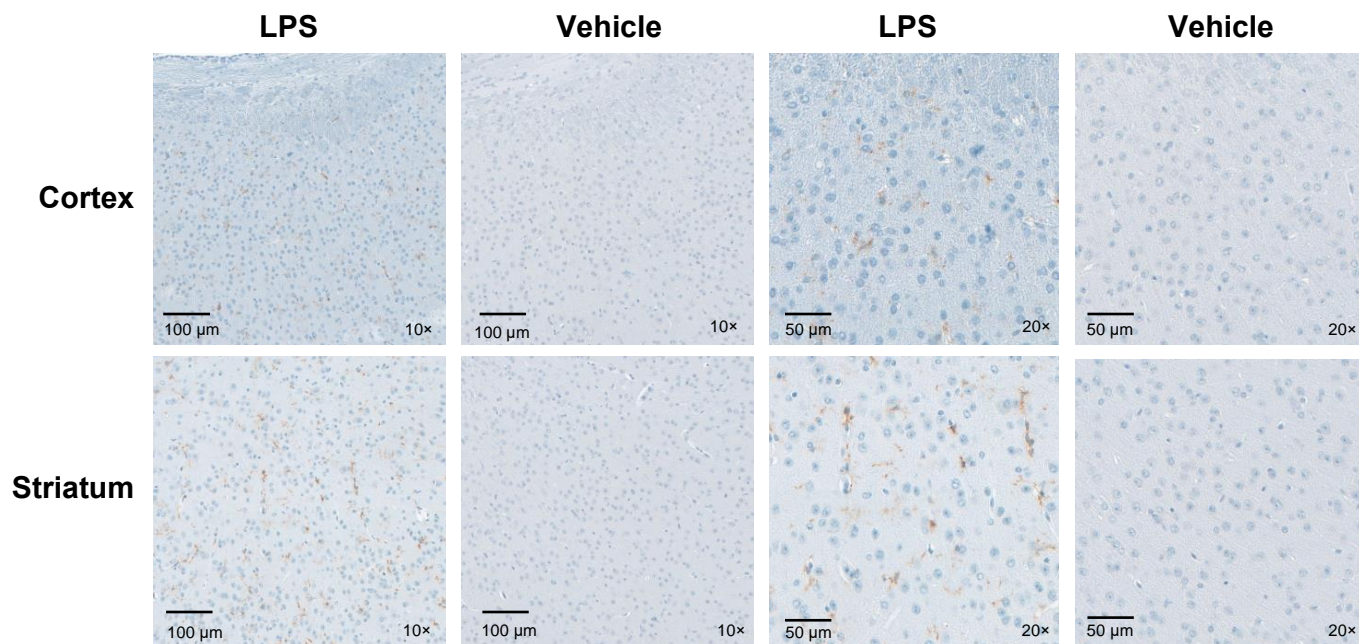

‡**Supplemental Fig. 19.** Immunohistochemical staining of TMEM119 show an increase in microglia in select brain regions of LPS-treated mice vs. vehicle ( $n = 3/\text{group}$ ).

†**Supplemental Table 2.** Full ex vivo biodistribution of  $[^{64}\text{Cu}]\text{Cu}-[\text{E}_5\text{K}]\text{W}_5\text{C}$  at 24 h. Data is represented as average %ID/g  $\pm$  SD with  $n = 4$  animals/group. Abbreviations: SI: small intestine; LI: large intestine.

| 24 h     |                 |                  |          |
|----------|-----------------|------------------|----------|
| Tissue   | Vehicle         | LPS              | P value  |
| Brain    | 0.14 $\pm$ 0.03 | 0.20 $\pm$ 0.06  | 0.134697 |
| Blood    | 0.60 $\pm$ 0.11 | 2.23 $\pm$ 0.96  | 0.017429 |
| Heart    | 1.13 $\pm$ 0.33 | 1.76 $\pm$ 0.93  | 0.256697 |
| Lungs    | 2.00 $\pm$ 1.66 | 1.83 $\pm$ 1.29  | 0.893041 |
| Liver    | 5.30 $\pm$ 1.87 | 26.06 $\pm$ 3.63 | 0.00017  |
| Spleen   | 1.14 $\pm$ 0.63 | 1.77 $\pm$ 0.71  | 0.26613  |
| Pancreas | 0.61 $\pm$ 0.10 | 1.22 $\pm$ 0.69  | 0.114409 |
| Stomach  | 0.54 $\pm$ 0.32 | 2.70 $\pm$ 1.86  | 0.065958 |
| SI       | 1.98 $\pm$ 0.76 | 5.72 $\pm$ 5.32  | 0.19078  |
| LI       | 5.20 $\pm$ 1.24 | 5.04 $\pm$ 4.48  | 0.946782 |
| Kidneys  | 3.87 $\pm$ 1.55 | 5.92 $\pm$ 2.48  | 0.234547 |
| Muscle   | 0.43 $\pm$ 0.14 | 0.93 $\pm$ 0.61  | 0.160568 |
| Bone     | 0.66 $\pm$ 0.36 | 0.99 $\pm$ 0.46  | 0.332227 |
| Skin     | 0.44 $\pm$ 0.21 | 1.03 $\pm$ 0.50  | 0.081138 |
| Tail     | 0.36 $\pm$ 0.09 | 0.63 $\pm$ 0.29  | 0.13116  |

‡**Supplemental Table 3.** Full ex vivo biodistribution of [<sup>64</sup>Cu]Cu-c[E<sub>4</sub>W<sub>5</sub>C] at 12 and 24 h (*n* = 4/group) with respective P values (as determined by unpaired two-tailed t-test) comparing vehicle and LPS-treated groups. Data is represented as average %ID/g ± SD with *n* = 4 animals/group.

| 12 h     |              |              |          |
|----------|--------------|--------------|----------|
| Tissue   | Vehicle      | LPS          | P value  |
| Brain    | 0.20 ± 0.05  | 0.25 ± 0.06  | 0.353235 |
| Blood    | 1.08 ± 0.09  | 2.73 ± 1.43  | 0.117516 |
| Heart    | 1.79 ± 0.42  | 2.71 ± 0.45  | 0.061524 |
| Lungs    | 1.95 ± 0.62  | 2.82 ± 0.64  | 0.305098 |
| Liver    | 10.24 ± 1.41 | 12.68 ± 3.71 | 0.34753  |
| Spleen   | 2.60 ± 0.84  | 3.37 ± 0.30  | 0.205689 |
| Pancreas | 1.32 ± 0.41  | 2.29 ± 0.32  | 0.032566 |
| Stomach  | 3.52 ± 1.66  | 3.20 ± 1.08  | 0.791259 |
| SI       | 5.07 ± 1.04  | 11.71 ± 4.73 | 0.07658  |
| LI       | 14.14 ± 2.94 | 4.60 ± 0.73  | 0.005475 |
| Kidneys  | 7.13 ± 1.30  | 13.27 ± 2.54 | 0.020305 |
| Muscle   | 0.31 ± 0.23  | 1.07 ± 0.15  | 0.008741 |
| Bone     | 0.72 ± 0.16  | 1.34 ± 0.36  | 0.052285 |
| Skin     | 1.35 ± 0.14  | 2.78 ± 1.46  | 0.164904 |

| 24 h     |              |              |          |
|----------|--------------|--------------|----------|
| Tissue   | Vehicle      | LPS          | P value  |
| Brain    | 0.29 ± 0.05  | 0.43 ± 0.04  | 0.000308 |
| Blood    | 1.29 ± 0.27  | 3.60 ± 1.77  | 0.009368 |
| Heart    | 2.35 ± 0.45  | 2.54 ± 0.45  | 0.469931 |
| Lungs    | 1.94 ± 0.84  | 3.79 ± 1.49  | 0.032256 |
| Liver    | 12.07 ± 1.56 | 23.84 ± 5.32 | 0.000793 |
| Spleen   | 2.64 ± 0.92  | 3.80 ± 1.23  | 0.085074 |
| Pancreas | 1.24 ± 0.36  | 2.47 ± 0.85  | 0.007407 |
| Stomach  | 1.59 ± 0.94  | 2.66 ± 1.81  | 0.222081 |
| SI       | 4.36 ± 1.33  | 15.75 ± 6.78 | 0.002016 |
| LI       | 10.04 ± 3.57 | 5.41 ± 4.18  | 0.057131 |
| Kidneys  | 7.17 ± 1.98  | 9.74 ± 0.81  | 0.009285 |
| Muscle   | 0.70 ± 0.26  | 1.19 ± 0.29  | 0.01123  |
| Bone     | 1.23 ± 0.36  | 1.43 ± 0.53  | 0.468761 |
| Skin     | 1.17 ± 0.27  | 2.47 ± 0.71  | 0.00139  |

†**Supplemental Table 4.** PET quantitation of [<sup>64</sup>Cu]Cu-c[E<sub>4</sub>W<sub>5</sub>C] of select regions at 4, 8, 12, and 24 h post-LPS injection. Data is represented as average %ID/g ± SD with *n* = 4 animals/group.

Abbreviations: SI: small intestine; LI: large intestine.

| 24 h    |             |              |          |
|---------|-------------|--------------|----------|
| Tissue  | Vehicle     | LPS          | P value  |
| Liver   | 5.99 ± 0.47 | 13.12 ± 2.91 | 7.34E-05 |
| SI      | 5.26 ± 0.57 | 13.20 ± 3.68 | 0.000229 |
| Kidneys | 3.17 ± 0.62 | 6.59 ± 1.70  | 0.000562 |
| Lungs   | 1.25 ± 0.13 | 1.99 ± 0.36  | 0.000419 |

| 12 h    |             |              |          |
|---------|-------------|--------------|----------|
| Tissue  | Vehicle     | LPS          | P value  |
| Liver   | 6.56 ± 0.99 | 13.63 ± 1.81 | 0.000473 |
| SI      | 5.86 ± 0.65 | 12.07 ± 1.68 | 0.00046  |
| Kidneys | 5.90 ± 2.61 | 10.80 ± 2.49 | 0.035003 |
| Lungs   | 1.18 ± 0.02 | 2.24 ± 0.38  | 0.001443 |

| 8 h     |             |              |          |
|---------|-------------|--------------|----------|
| Tissue  | Vehicle     | LPS          | P value  |
| Liver   | 9.00 ± 0.26 | 15.64 ± 0.58 | 8.14E-07 |
| SI      | 8.66 ± 0.13 | 16.70 ± 1.15 | 8.81E-06 |
| Kidneys | 6.34 ± 0.74 | 11.03 ± 0.29 | 2.22E-05 |
| Lungs   | 1.22 ± 0.06 | 2.06 ± 0.11  | 1.43E-05 |

| 4 h     |             |              |          |
|---------|-------------|--------------|----------|
| Tissue  | Vehicle     | LPS          | P value  |
| Liver   | 8.99 ± 2.37 | 18.49 ± 4.77 | 0.011877 |
| SI      | 8.08 ± 2.23 | 16.83 ± 5.04 | 0.019203 |
| Kidneys | 8.46 ± 2.22 | 14.08 ± 3.62 | 0.058369 |
| Lungs   | 1.73 ± 0.44 | 3.35 ± 0.88  | 0.01618  |

**†Supplemental Table 5.** Full PET quantitation of brain regions at 4, 8, 12, and 24 h post-LPS injection for [<sup>64</sup>Cu]Cu-c[E<sub>4</sub>W<sub>5</sub>C]. Data is represented as average %ID/g ± SD with *n* = 4 animals/group. Abbreviations: Corpus Call: Corpus Callosum.

| 24 h         |             |             |         |
|--------------|-------------|-------------|---------|
| Tissue       | Vehicle     | LPS         | P value |
| Medulla      | 0.41 ± 0.12 | 0.76 ± 0.06 | 0.0018  |
| Cerebellum   | 0.36 ± 0.07 | 0.56 ± 0.09 | 0.0265  |
| Midbrain     | 0.30 ± 0.03 | 0.48 ± 0.09 | 0.0113  |
| Pons         | 0.37 ± 0.08 | 0.75 ± 0.10 | <0.0001 |
| Cortex       | 0.28 ± 0.04 | 0.53 ± 0.08 | 0.0025  |
| Hippocampus  | 0.29 ± 0.05 | 0.48 ± 0.10 | 0.0452  |
| Thalamus     | 0.31 ± 0.07 | 0.42 ± 0.08 | 0.97    |
| Hypothalamus | 0.42 ± 0.07 | 0.90 ± 0.18 | <0.0001 |
| Striatum     | 0.34 ± 0.07 | 0.53 ± 0.07 | 0.0914  |
| Pallidum     | 0.35 ± 0.06 | 0.62 ± 0.10 | 0.001   |
| Olfactory    | 0.37 ± 0.05 | 0.62 ± 0.11 | 0.0098  |
| Corpus Call  | 0.32 ± 0.06 | 0.45 ± 0.07 | 0.5863  |
| White Matter | 0.31 ± 0.05 | 0.49 ± 0.07 | 0.1875  |
| Ventricles   | 0.39 ± 0.09 | 0.48 ± 0.06 | 0.9834  |
| Entire Atlas | 0.33 ± 0.05 | 0.56 ± 0.08 | 0.0067  |

| 12 h         |               |               |         |
|--------------|---------------|---------------|---------|
| Tissue       | Vehicle       | LPS           | P value |
| Medulla      | 0.34 ± 0.0643 | 0.60 ± 0.0805 | <0.0001 |
| Cerebellum   | 0.25 ± 0.0155 | 0.47 ± 0.0681 | 0.0005  |
| Midbrain     | 0.22 ± 0.0290 | 0.37 ± 0.0601 | 0.0418  |
| Pons         | 0.37 ± 0.0880 | 0.58 ± 0.1498 | 0.0011  |
| Cortex       | 0.25 ± 0.0206 | 0.47 ± 0.0373 | 0.0006  |
| Hippocampus  | 0.24 ± 0.0297 | 0.38 ± 0.0758 | 0.097   |
| Thalamus     | 0.23 ± 0.0252 | 0.34 ± 0.0323 | 0.3633  |
| Hypothalamus | 0.42 ± 0.0706 | 0.68 ± 0.1957 | <0.0001 |
| Striatum     | 0.27 ± 0.0400 | 0.43 ± 0.0463 | 0.0318  |
| Pallidum     | 0.29 ± 0.0551 | 0.49 ± 0.0934 | 0.0019  |
| Olfactory    | 0.39 ± 0.0337 | 0.63 ± 0.1201 | 0.0001  |
| Corpus Call  | 0.25 ± 0.0046 | 0.35 ± 0.0605 | 0.5486  |
| White Matter | 0.26 ± 0.0219 | 0.39 ± 0.0775 | 0.1633  |
| Ventricles   | 0.30 ± 0.0194 | 0.41 ± 0.0456 | 0.4474  |
| Entire Atlas | 0.28 ± 0.0232 | 0.48 ± 0.0615 | 0.0024  |

| 8 h          |               |               |         |
|--------------|---------------|---------------|---------|
| Tissue       | Vehicle       | LPS           | P value |
| Medulla      | 0.34 ± 0.0269 | 0.51 ± 0.0023 | <0.0001 |
| Cerebellum   | 0.29 ± 0.0002 | 0.46 ± 0.0716 | <0.0001 |
| Midbrain     | 0.21 ± 0.0422 | 0.27 ± 0.0034 | 0.7013  |
| Pons         | 0.34 ± 0.0678 | 0.43 ± 0.0213 | 0.0612  |
| Cortex       | 0.28 ± 0.0221 | 0.43 ± 0.0168 | 0.0003  |
| Hippocampus  | 0.24 ± 0.0184 | 0.34 ± 0.0047 | 0.0736  |
| Thalamus     | 0.21 ± 0.0317 | 0.27 ± 0.0395 | 0.5882  |
| Hypothalamus | 0.43 ± 0.0032 | 0.48 ± 0.0016 | 0.6548  |
| Striatum     | 0.27 ± 0.0278 | 0.36 ± 0.0089 | 0.1404  |
| Pallidum     | 0.29 ± 0.0472 | 0.39 ± 0.0114 | 0.0535  |
| Olfactory    | 0.33 ± 0.0518 | 0.52 ± 0.0342 | <0.0001 |
| Corpus Call  | 0.24 ± 0.0105 | 0.33 ± 0.0331 | 0.0587  |
| White Matter | 0.25 ± 0.0255 | 0.34 ± 0.0060 | 0.056   |
| Ventricles   | 0.23 ± 0.0182 | 0.36 ± 0.0390 | 0.0029  |
| Entire Atlas | 0.28 ± 0.0250 | 0.41 ± 0.0038 | 0.0034  |

| 4 h          |               |               |         |
|--------------|---------------|---------------|---------|
| Tissue       | Vehicle       | LPS           | P value |
| Medulla      | 0.41 ± 0.0323 | 0.62 ± 0.0681 | <0.0001 |
| Cerebellum   | 0.30 ± 0.0278 | 0.57 ± 0.0677 | <0.0001 |
| Midbrain     | 0.20 ± 0.0175 | 0.32 ± 0.0522 | 0.003   |
| Pons         | 0.32 ± 0.0299 | 0.47 ± 0.0719 | 0.0001  |
| Cortex       | 0.35 ± 0.0432 | 0.55 ± 0.0599 | <0.0001 |
| Hippocampus  | 0.25 ± 0.0152 | 0.40 ± 0.0204 | <0.0001 |
| Thalamus     | 0.18 ± 0.0119 | 0.33 ± 0.0563 | <0.0001 |
| Hypothalamus | 0.39 ± 0.0425 | 0.44 ± 0.0794 | 0.7646  |
| Striatum     | 0.28 ± 0.0240 | 0.37 ± 0.0252 | 0.0611  |
| Pallidum     | 0.32 ± 0.0192 | 0.39 ± 0.0388 | 0.3031  |
| Olfactory    | 0.40 ± 0.0532 | 0.63 ± 0.0606 | <0.0001 |
| Corpus Call  | 0.24 ± 0.0315 | 0.39 ± 0.0224 | <0.0001 |
| White Matter | 0.24 ± 0.0299 | 0.37 ± 0.0273 | 0.0009  |
| Ventricles   | 0.25 ± 0.0370 | 0.42 ± 0.0576 | <0.0001 |
| Entire Atlas | 0.31 ± 0.0259 | 0.49 ± 0.0327 | <0.0001 |

**†Supplemental Table 6. A.** Full PET quantitation of brain regions for [<sup>64</sup>Cu]Cu-c[R<sub>4</sub>W<sub>5</sub>C] and [<sup>64</sup>Cu]Cu-c[E<sub>4</sub>W<sub>5</sub>C] at 4, 8, and 12 h post-LPS injection. Data is represented as average %ID/g ± SD with *n* = 4 animals/group. Abbreviations: Corpus Call: Corpus Callosum. B. P values comparing LPS groups of [<sup>64</sup>Cu]Cu-c[E<sub>4</sub>W<sub>5</sub>C] vs. LPS of [<sup>64</sup>Cu]Cu-c[R<sub>4</sub>W<sub>5</sub>C].

A.

| [ <sup>64</sup> Cu]Cu-c[E <sub>4</sub> W <sub>5</sub> C] |               |               |         |
|----------------------------------------------------------|---------------|---------------|---------|
| 4 h                                                      |               |               |         |
| Tissue                                                   | Vehicle       | LPS           | P value |
| Medulla                                                  | 1.25 ± 0.5609 | 1.60 ± 0.1148 | 0.9867  |
| Cerebellum                                               | 1.03 ± 0.4117 | 1.36 ± 0.0425 | 0.9925  |
| Midbrain                                                 | 0.71 ± 0.2843 | 0.94 ± 0.1681 | 0.9998  |
| Pons                                                     | 1.14 ± 0.5968 | 1.50 ± 0.2231 | 0.9851  |
| Cortex                                                   | 1.22 ± 0.5491 | 1.68 ± 0.0997 | 0.8847  |
| Hippocampus                                              | 0.92 ± 0.5016 | 1.23 ± 0.0449 | 0.9953  |
| Thalamus                                                 | 0.63 ± 0.3106 | 0.96 ± 0.0875 | 0.9924  |
| Hypothalamus                                             | 1.34 ± 0.6794 | 1.72 ± 0.0969 | 0.9755  |
| Striatum                                                 | 1.23 ± 0.5616 | 1.66 ± 0.0861 | 0.9208  |
| Pallidum                                                 | 1.38 ± 0.6004 | 1.80 ± 0.0854 | 0.9343  |
| Olfactory                                                | 1.57 ± 0.6618 | 2.28 ± 0.0574 | 0.2632  |
| Corpus Call                                              | 0.80 ± 0.3868 | 1.10 ± 0.0671 | 0.9968  |
| White Matter                                             | 0.91 ± 0.4999 | 1.28 ± 0.0414 | 0.9731  |
| Ventricles                                               | 0.73 ± 0.3198 | 1.07 ± 0.1294 | 0.9888  |
| Entire Atlas                                             | 1.12 ± 0.4961 | 1.53 ± 0.0317 | 0.9544  |

| [ <sup>64</sup> Cu]Cu-c[E <sub>4</sub> W <sub>5</sub> C] |               |               |         |
|----------------------------------------------------------|---------------|---------------|---------|
| 8 h                                                      |               |               |         |
| Tissue                                                   | Vehicle       | LPS           | P value |
| Medulla                                                  | 0.78 ± 0.2847 | 1.29 ± 0.1236 | 0.068   |
| Cerebellum                                               | 0.58 ± 0.2410 | 0.85 ± 0.1402 | 0.8532  |
| Midbrain                                                 | 0.53 ± 0.1328 | 0.83 ± 0.1918 | 0.875   |
| Pons                                                     | 0.89 ± 0.2858 | 1.09 ± 0.1944 | 0.9836  |
| Cortex                                                   | 0.78 ± 0.1364 | 1.41 ± 0.1048 | 0.0089  |
| Hippocampus                                              | 0.61 ± 0.1341 | 0.85 ± 0.1243 | 0.9281  |
| Thalamus                                                 | 0.64 ± 0.1653 | 0.95 ± 0.1669 | 0.8495  |
| Hypothalamus                                             | 1.17 ± 0.0641 | 1.71 ± 0.3452 | 0.0391  |
| Striatum                                                 | 0.89 ± 0.1870 | 1.66 ± 0.1595 | 0.0006  |
| Pallidum                                                 | 1.06 ± 0.2457 | 2.00 ± 0.3164 | <0.0001 |
| Olfactory                                                | 1.29 ± 0.1933 | 1.83 ± 0.5715 | 0.0447  |
| Corpus Call                                              | 0.58 ± 0.0858 | 1.00 ± 0.0674 | 0.247   |
| White Matter                                             | 0.73 ± 0.1295 | 1.11 ± 0.2685 | 0.3607  |
| Ventricles                                               | 0.63 ± 0.0685 | 0.95 ± 0.1632 | 0.6392  |
| Entire Atlas                                             | 0.78 ± 0.1146 | 1.26 ± 0.1011 | 0.0979  |

| [ <sup>64</sup> Cu]Cu-c[E <sub>4</sub> W <sub>5</sub> C] |               |               |         |
|----------------------------------------------------------|---------------|---------------|---------|
| 12 h                                                     |               |               |         |
| Tissue                                                   | Vehicle       | LPS           | P value |
| Medulla                                                  | 0.84 ± 0.0594 | 1.43 ± 0.4628 | 0.0263  |
| Cerebellum                                               | 0.52 ± 0.0160 | 0.95 ± 0.0731 | 0.2657  |
| Midbrain                                                 | 0.59 ± 0.1377 | 0.95 ± 0.0930 | 0.5367  |
| Pons                                                     | 1.01 ± 0.0694 | 1.46 ± 0.4543 | 0.1885  |
| Cortex                                                   | 0.80 ± 0.1218 | 1.46 ± 0.1726 | 0.0083  |
| Hippocampus                                              | 0.70 ± 0.1167 | 1.02 ± 0.1344 | 0.7389  |
| Thalamus                                                 | 0.70 ± 0.0376 | 1.04 ± 0.1078 | 0.7556  |
| Hypothalamus                                             | 1.40 ± 0.1751 | 2.32 ± 0.0164 | 0.0004  |
| Striatum                                                 | 0.98 ± 0.1259 | 1.74 ± 0.3162 | 0.0013  |
| Pallidum                                                 | 1.19 ± 0.1403 | 2.07 ± 0.4068 | 0.0001  |
| Olfactory                                                | 1.57 ± 0.2795 | 2.21 ± 0.5166 | 0.0125  |
| Corpus Call                                              | 0.66 ± 0.0616 | 1.06 ± 0.1007 | 0.3912  |
| White Matter                                             | 0.85 ± 0.0942 | 1.21 ± 0.2344 | 0.5445  |
| Ventricles                                               | 0.76 ± 0.1489 | 1.02 ± 0.1888 | 0.9193  |
| Entire Atlas                                             | 0.84 ± 0.0854 | 1.40 ± 0.2250 | 0.0478  |

| [ <sup>64</sup> Cu]Cu-c[R <sub>4</sub> W <sub>5</sub> C] |               |               |         |
|----------------------------------------------------------|---------------|---------------|---------|
| 4 h                                                      |               |               |         |
| Tissue                                                   | Vehicle       | LPS           | P value |
| Medulla                                                  | 0.85 ± 0.3509 | 0.98 ± 0.2381 | >0.9999 |
| Cerebellum                                               | 0.61 ± 0.1526 | 0.93 ± 0.0764 | 0.6146  |
| Midbrain                                                 | 0.44 ± 0.0613 | 0.69 ± 0.0936 | 0.9003  |
| Pons                                                     | 0.90 ± 0.4364 | 1.13 ± 0.2762 | 0.9572  |
| Cortex                                                   | 1.36 ± 0.1422 | 1.72 ± 0.3262 | 0.4365  |
| Hippocampus                                              | 0.64 ± 0.0860 | 0.84 ± 0.1126 | 0.9885  |
| Thalamus                                                 | 0.46 ± 0.1028 | 0.57 ± 0.1568 | >0.9999 |
| Hypothalamus                                             | 1.18 ± 0.4057 | 1.34 ± 0.2991 | 0.9987  |
| Striatum                                                 | 1.15 ± 0.2427 | 1.42 ± 0.3495 | 0.8262  |
| Pallidum                                                 | 1.22 ± 0.3362 | 1.63 ± 0.3765 | 0.2459  |
| Olfactory                                                | 1.73 ± 0.2030 | 2.13 ± 0.2000 | 0.274   |
| Corpus Call                                              | 0.80 ± 0.1871 | 1.06 ± 0.2804 | 0.8945  |
| White Matter                                             | 0.74 ± 0.1713 | 0.88 ± 0.1912 | 0.9997  |
| Ventricles                                               | 0.62 ± 0.1991 | 0.78 ± 0.1760 | 0.9985  |
| Entire Atlas                                             | 1.02 ± 0.1380 | 1.31 ± 0.1586 | 0.7897  |

| [ <sup>64</sup> Cu]Cu-c[R <sub>4</sub> W <sub>5</sub> C] |               |               |         |
|----------------------------------------------------------|---------------|---------------|---------|
| 8 h                                                      |               |               |         |
| Tissue                                                   | Vehicle       | LPS           | P value |
| Medulla                                                  | 0.84 ± 0.2166 | 0.68 ± 0.4077 | >0.9999 |
| Cerebellum                                               | 0.48 ± 0.1086 | 0.58 ± 0.3103 | >0.9999 |
| Midbrain                                                 | 0.34 ± 0.0807 | 0.47 ± 0.2217 | >0.9999 |
| Pons                                                     | 0.74 ± 0.1597 | 0.74 ± 0.4566 | >0.9999 |
| Cortex                                                   | 0.93 ± 0.1353 | 1.02 ± 0.6332 | >0.9999 |
| Hippocampus                                              | 0.44 ± 0.0803 | 0.51 ± 0.2429 | >0.9999 |
| Thalamus                                                 | 0.36 ± 0.0631 | 0.36 ± 0.1825 | >0.9999 |
| Hypothalamus                                             | 0.92 ± 0.0953 | 0.90 ± 0.4926 | >0.9999 |
| Striatum                                                 | 0.84 ± 0.0735 | 0.79 ± 0.4829 | >0.9999 |
| Pallidum                                                 | 0.97 ± 0.1147 | 0.92 ± 0.5532 | >0.9999 |
| Olfactory                                                | 1.24 ± 0.0785 | 1.24 ± 0.7622 | >0.9999 |
| Corpus Call                                              | 0.55 ± 0.1355 | 0.62 ± 0.4047 | >0.9999 |
| White Matter                                             | 0.58 ± 0.0740 | 0.54 ± 0.3092 | >0.9999 |
| Ventricles                                               | 0.46 ± 0.1284 | 0.43 ± 0.2564 | >0.9999 |
| Entire Atlas                                             | 0.75 ± 0.0673 | 0.79 ± 0.4478 | >0.9999 |

| [ <sup>64</sup> Cu]Cu-c[R <sub>4</sub> W <sub>5</sub> C] |               |               |         |
|----------------------------------------------------------|---------------|---------------|---------|
| 12 h                                                     |               |               |         |
| Tissue                                                   | Vehicle       | LPS           | P value |
| Medulla                                                  | 0.97 ± 0.5238 | 0.99 ± 0.4925 | >0.9999 |
| Cerebellum                                               | 0.46 ± 0.1955 | 0.63 ± 0.0371 | 0.9998  |
| Midbrain                                                 | 0.43 ± 0.1039 | 0.57 ± 0.1393 | >0.9999 |
| Pons                                                     | 0.91 ± 0.4497 | 0.90 ± 0.1958 | >0.9999 |
| Cortex                                                   | 0.99 ± 0.1672 | 1.41 ± 0.4427 | 0.5378  |
| Hippocampus                                              | 0.49 ± 0.1035 | 0.75 ± 0.1821 | 0.9762  |
| Thalamus                                                 | 0.44 ± 0.0829 | 0.67 ± 0.2511 | 0.9917  |
| Hypothalamus                                             | 1.04 ± 0.2369 | 1.36 ± 0.4835 | 0.88    |
| Striatum                                                 | 0.99 ± 0.0891 | 1.31 ± 0.4217 | 0.8977  |
| Pallidum                                                 | 1.08 ± 0.1151 | 1.45 ± 0.4605 | 0.7245  |
| Olfactory                                                | 1.38 ± 0.1291 | 1.70 ± 0.3253 | 0.8813  |
| Corpus Call                                              | 0.61 ± 0.1808 | 1.01 ± 0.4529 | 0.6014  |
| White Matter                                             | 0.66 ± 0.0717 | 0.92 ± 0.2861 | 0.9766  |
| Ventricles                                               | 0.51 ± 0.1010 | 0.82 ± 0.2696 | 0.9111  |
| Entire Atlas                                             | 0.83 ± 0.1128 | 1.11 ± 0.2655 | 0.9552  |

B.

| Region       | 4 h    | 8 h    | 12 h   |
|--------------|--------|--------|--------|
| Medulla      | 0.0231 | 0.0237 | 0.3240 |
| Cerebellum   | 0.0003 | 0.1891 | 0.0023 |
| Midbrain     | 0.1038 | 0.1752 | 0.0176 |
| Pons         | 0.1739 | 0.1498 | 0.1193 |
| Cortex       | 0.2731 | 0.4181 | 0.8739 |
| Hippocampus  | 0.0081 | 0.1195 | 0.1087 |
| Thalamus     | 0.0329 | 0.0484 | 0.1546 |
| Hypothalamus | 0.1370 | 0.0530 | 0.0776 |
| Striatum     | 0.5405 | 0.0577 | 0.2232 |
| Pallidum     | 0.7454 | 0.0537 | 0.1572 |
| Olfactory    | 0.3284 | 0.3285 | 0.2250 |
| Corpus Call  | 0.5453 | 0.3013 | 0.8729 |
| White Matter | 0.0457 | 0.0680 | 0.2441 |
| Ventricles   | 0.1240 | 0.0616 | 0.3451 |
| Entire Atlas | 0.1217 | 0.1720 | 0.2305 |

‡**Supplemental Table 7. A.** PET quantitation of [<sup>64</sup>Cu]Cu-c[R<sub>4</sub>W<sub>5</sub>C] and [<sup>64</sup>Cu]Cu-c[E<sub>4</sub>W<sub>5</sub>C] of select peripheral regions at 4, 8, and 12 h post-LPS injection. Data is represented as average %ID/g ± SD with *n* = 4 animals/group. P values comparing LPS groups of [<sup>64</sup>Cu]Cu-c[E<sub>4</sub>W<sub>5</sub>C] vs. LPS of [<sup>64</sup>Cu]Cu-c[R<sub>4</sub>W<sub>5</sub>C].

A.

| <sup>64</sup> Cu]Cu-c[E <sub>4</sub> W <sub>5</sub> C] |             |              |          |
|--------------------------------------------------------|-------------|--------------|----------|
| 12 h                                                   |             |              |          |
| Tissue                                                 | Vehicle     | LPS          | P value  |
| Liver                                                  | 8.09 ± 0.86 | 20.10 ± 1.54 | 4.28E-05 |
| SI                                                     | 6.15 ± 0.73 | 10.01 ± 1.80 | 0.01071  |
| Kidneys                                                | 6.50 ± 1.03 | 14.72 ± 1.45 | 0.000306 |
| Lungs                                                  | 3.35 ± 0.53 | 4.60 ± 0.41  | 0.020156 |

| <sup>64</sup> Cu]Cu-c[R <sub>4</sub> W <sub>5</sub> C] |              |              |          |
|--------------------------------------------------------|--------------|--------------|----------|
| 12 h                                                   |              |              |          |
| Tissue                                                 | Vehicle      | LPS          | P value  |
| Liver                                                  | 17.85 ± 0.86 | 22.24 ± 2.81 | 0.060934 |
| SI                                                     | 3.81 ± 0.79  | 4.21 ± 0.14  | 0.433827 |
| Kidneys                                                | 5.96 ± 2.24  | 8.01 ± 2.24  | 0.285222 |
| Lungs                                                  | 2.30 ± 1.11  | 3.28 ± 1.09  | 0.297125 |

| 8 h     |             |              |          |
|---------|-------------|--------------|----------|
| Tissue  | Vehicle     | LPS          | P value  |
| Liver   | 9.38 ± 0.86 | 18.97 ± 1.78 | 0.000207 |
| SI      | 8.02 ± 1.13 | 13.80 ± 2.38 | 0.007492 |
| Kidneys | 9.35 ± 1.19 | 13.33 ± 2.94 | 0.053726 |
| Lungs   | 3.12 ± 0.50 | 4.50 ± 0.64  | 0.023478 |

| 8 h     |              |              |          |
|---------|--------------|--------------|----------|
| Tissue  | Vehicle      | LPS          | P value  |
| Liver   | 18.94 ± 3.42 | 16.04 ± 8.48 | 0.549311 |
| SI      | 3.48 ± 0.68  | 2.76 ± 0.82  | 0.225002 |
| Kidneys | 5.78 ± 1.37  | 8.34 ± 3.25  | 0.197844 |
| Lungs   | 1.96 ± 0.59  | 2.78 ± 0.70  | 0.122158 |

| 4 h     |              |              |          |
|---------|--------------|--------------|----------|
| Tissue  | Vehicle      | LPS          | P value  |
| Liver   | 7.80 ± 1.59  | 15.55 ± 1.79 | 0.001754 |
| SI      | 3.06 ± 0.96  | 4.77 ± 0.09  | 0.036791 |
| Kidneys | 11.96 ± 5.01 | 18.52 ± 2.14 | 0.090854 |
| Lungs   | 4.42 ± 0.84  | 6.18 ± 0.68  | 0.032067 |

| 4 h     |              |              |          |
|---------|--------------|--------------|----------|
| Tissue  | Vehicle      | LPS          | P value  |
| Liver   | 17.85 ± 1.80 | 18.42 ± 2.79 | 0.745327 |
| SI      | 3.43 ± 0.78  | 3.38 ± 1.01  | 0.936461 |
| Kidneys | 10.44 ± 1.17 | 8.55 ± 2.60  | 0.234361 |
| Lungs   | 3.04 ± 1.24  | 3.96 ± 0.73  | 0.247581 |

B.

| 12 h    |          |
|---------|----------|
| Tissue  | P value  |
| Liver   | 0.311215 |
| SI      | 0.01219  |
| Kidneys | 0.120675 |
| Lungs   | 0.005155 |

| 8 h     |          |
|---------|----------|
| Tissue  | P value  |
| Liver   | 0.589591 |
| SI      | 0.091147 |
| Kidneys | 0.020825 |
| Lungs   | 0.000309 |

| 4 h     |          |
|---------|----------|
| Tissue  | P value  |
| Liver   | 0.333823 |
| SI      | 0.009154 |
| Kidneys | 0.027715 |
| Lungs   | 0.144527 |

‡**Supplemental Table 8.** A. Full ex vivo biodistribution of [<sup>64</sup>Cu]Cu-c[R<sub>4</sub>W<sub>5</sub>C] and [<sup>64</sup>Cu]Cu-c[E<sub>4</sub>W<sub>5</sub>C] with respective P values (as determined by unpaired two-tailed t-test) comparing vehicle and LPS-treated groups at 24 h-post LPS administration. Data is represented as average %ID/g ± SD (*n* = 4/group for vehicle, *n* = 2/LPS for group). P values comparing LPS groups of [<sup>64</sup>Cu]Cu-c[E<sub>4</sub>W<sub>5</sub>C] vs. LPS of [<sup>64</sup>Cu]Cu-c[R<sub>4</sub>W<sub>5</sub>C].

A.

| <sup>64</sup> Cu]Cu-c[E <sub>4</sub> W <sub>5</sub> C] |             |              |         | <sup>64</sup> Cu]Cu-c[R <sub>4</sub> W <sub>5</sub> C] |              |               |         |
|--------------------------------------------------------|-------------|--------------|---------|--------------------------------------------------------|--------------|---------------|---------|
| Tissue                                                 | Vehicle     | LPS          | P value | Tissue                                                 | Vehicle      | LPS           | P value |
| Blood                                                  | 0.98 ± 0.18 | 2.58 ± 1.28  | 0.0231  | Blood                                                  | 0.94 ± 0.08  | 1.18 ± 0.31   | 0.2357  |
| Heart                                                  | 2.01 ± 0.35 | 2.23 ± 0.97  | 0.6473  | Heart                                                  | 1.21 ± 0.10  | 0.99 ± 0.32   | 0.2778  |
| Lungs                                                  | 1.76 ± 0.93 | 3.70 ± 0.30  | 0.0402  | Lungs                                                  | 1.63 ± 0.80  | 1.45 ± 1.30   | 0.8131  |
| Liver                                                  | 8.22 ± 1.27 | 20.98 ± 9.22 | 0.0161  | Liver                                                  | 18.54 ± 4.58 | 20.57 ± 12.23 | 0.7457  |
| Spleen                                                 | 1.17 ± 0.27 | 1.58 ± 0.85  | 0.3258  | Spleen                                                 | 5.25 ± 0.57  | 5.59 ± 3.51   | 0.8305  |
| Pancreas                                               | 1.00 ± 0.25 | 1.99 ± 1.30  | 0.1157  | Pancreas                                               | 1.18 ± 0.28  | 1.41 ± 0.66   | 0.5319  |
| Stomach                                                | 2.10 ± 0.55 | 1.77 ± 1.00  | 0.5761  | Stomach                                                | 1.82 ± 1.37  | 0.82 ± 0.53   | 0.3487  |
| SI                                                     | 2.64 ± 0.56 | 10.74 ± 5.54 | 0.0123  | SI                                                     | 2.97 ± 0.14  | 5.16 ± 4.18   | 0.3340  |
| LI                                                     | 4.68 ± 0.95 | 2.20 ± 1.42  | 0.0379  | LI                                                     | 3.10 ± 0.77  | 1.69 ± 0.70   | 0.1630  |
| Kidneys                                                | 4.53 ± 1.05 | 8.47 ± 2.32  | 0.0200  | Kidneys                                                | 3.47 ± 0.20  | 5.36 ± 1.29   | 0.1333  |
| Muscle                                                 | 0.44 ± 0.13 | 0.70 ± 0.43  | 0.2243  | Muscle                                                 | 0.35 ± 0.08  | 0.34 ± 0.14   | 0.9149  |
| Bone                                                   | 0.90 ± 0.26 | 1.22 ± 0.57  | 0.3597  | Bone                                                   | 1.27 ± 0.60  | 1.27 ± 0.52   | 0.9857  |
| Skin                                                   | 0.42 ± 0.06 | 0.95 ± 0.12  | 0.0004  | Skin                                                   | 0.76 ± 0.28  | 0.52 ± 0.02   | 0.2911  |
| Brain                                                  | 0.34 ± 0.06 | 0.48 ± 0.01  | 0.0264  | Brain                                                  | 0.12 ± 0.02  | 0.09 ± 0.01   | 0.2129  |

B.

| Tissue   | P value  |
|----------|----------|
| Blood    | 0.271416 |
| Heart    | 0.229126 |
| Lungs    | 0.138901 |
| Liver    | 0.973091 |
| Spleen   | 0.257107 |
| Pancreas | 0.631845 |
| Stomach  | 0.358247 |
| SI       | 0.373264 |
| LI       | 0.693616 |
| Kidneys  | 0.238848 |
| Muscle   | 0.379655 |
| Bone     | 0.939168 |
| Skin     | 0.041169 |
| Brain    | 0.000693 |



## REFERENCES

1. Shen C, Menon R, Das D, Bansal N, Guduru N, Jaegle S, Reshetnyak Y. K. The protein fluorescence and structural toolkit: Database and programs for the analysis of protein fluorescence and structural data. *Proteins*. 2008;71(4):1744-54.
2. Dierckx RA, de Wiele CV. FDG uptake, a surrogate of tumour hypoxia? *Eur J Nuc Med and Mol Imag*. 2008;35(8), 1544-1549.
3. Longo DL, Bartoli A, Consolino L, Bardini P, Arena F, Schwaiger M, Aime S. In Vivo Imaging of Tumor Metabolism and Acidosis by Combining PET and MRI-CEST pH Imaging. *Cancer Res*. 2016;76(22):6463-6470.
4. Hoiland, RL, Bain, AR, Rieger, MG, Bailey,2 DM, Ainslie, PN. Hypoxemia, oxygen content, and the regulation of cerebral blood flow. *Am J Physiol Regul Comp Physiol*. 2016;310(5): R398-R413.
5. Michael T. Alkire, MT, Pomfrett, CJD, Haier, RJ, Gianzero, MV, Chan, CM, Jacobsen, BP, Fallon JH. Functional Brain Imaging during Anesthesia in Humans: Effects of Halothane on Global and Regional Cerebral Glucose Metabolism. *Clin Sci*. 1999;90(3): 701-709.
6. Alstrup, AKO, Landau, AM, Holden, JE, Jakobsen S, Schacht, AC, Audrain, H, Wegener G, Hansen AK, Gjedde, A, Doudet, DJ. Effects of Anesthesia and Species on the Uptake or Binding of Radioligands In Vivo in the Göttingen Minipig. *Biomed Res Int*. 2013; 2013: 808713.
